1 **Title:** Cell type boundaries organize plant development

2 **Authors:** Monica Pia Caggiano<sup>1#</sup>, Xiulian Yu<sup>1#</sup>, Neha Bhatia<sup>1#</sup>, André Larsson<sup>2</sup>, Hasthi  
3 Ram<sup>1</sup>, Carolyn Ohno<sup>1</sup>, Pia Sappl<sup>1</sup>, Elliot M. Meyerowitz<sup>3</sup>, Henrik Jönsson<sup>2,4,5</sup>, Marcus G.  
4 Heisler<sup>1,6\*</sup>

5  
6 **Affiliations:**

7 <sup>1</sup> European Molecular Biology Laboratory, Meyerhofstrasse 1, D-69117  
8 Heidelberg, Germany

9 <sup>2</sup> Computational Biology and Biological Physics, Department of Astronomy and  
10 Theoretical Physics, Lund University, Sweden

11 <sup>3</sup> Division of Biology and Biological Engineering and Howard Hughes Medical Institute,  
12 156-29, California Institute of Technology, Pasadena, CA 91125, USA.

13 <sup>4</sup> Sainsbury Laboratory, University of Cambridge, Cambridge, UK

14 <sup>5</sup> Department of Applied Mathematics and Theoretical Physics, University of Cambridge,  
15 UK

16 <sup>6</sup> School of Life and Environmental Sciences, University of Sydney, NSW, Australia

17 # - these authors contributed equally to this work

18 \* - author for correspondence: Marcus G Heisler ([marcus.heisler@sydney.edu.au](mailto:marcus.heisler@sydney.edu.au))

19

20 Once sentence summary: Cell type boundaries regulate plant development

21

22 **Abstract:** In plants the dorsoventral boundary of leaves defines an axis of symmetry  
23 through the centre of the organ separating the top (dorsal) and bottom (ventral) tissues.  
24 Although the positioning of this boundary is critical for leaf morphogenesis, how the  
25 boundary is established and how it influences development remains unclear. Using live-  
26 imaging and perturbation experiments we show that leaf orientation, morphology and  
27 position are pre-patterned by HD-ZIPIII and KAN gene expression in the shoot, leading  
28 to a model in which dorsoventral genes coordinate to regulate plant development by  
29 localizing auxin response between their expression domains. However we also find that  
30 auxin levels feedback on dorsoventral patterning by spatially organizing HD-ZIPIII and  
31 KAN expression in the shoot periphery. By demonstrating that the regulation of these

32 genes by auxin also governs their response to wounds, our results also provide a  
33 parsimonious explanation for the influence of wounds on leaf dorsoventrality.

34  
35

## 36 **Introduction**

37 Lateral organ development in plants and animals typically involves several processes  
38 occurring in a coordinated manner. These include organ positioning, the specification of  
39 different cell types and organ morphogenesis. Spatial cues specifying these processes are  
40 usually provided by a molecular pre-pattern present in precursor tissues, or from  
41 inductive signals emanating from neighboring regions. Unlike animals however, plant  
42 organs such as leaves arise continuously in regular patterns around the shoot apical  
43 meristem (SAM). Nevertheless, certain features of leaves are relatively constant  
44 including the restriction of their formation to the meristem periphery and their flattened,  
45 dorsoventral (top-bottom) orientation with respect to the shoot apex. How are these  
46 fundamental features specified?

47

48 Since the 1950s wounding experiments involving the isolation of leaf primordia from the  
49 meristem have suggested the presence of an inductive signal from the meristem that  
50 promotes dorsal identity within leaf primordia at the time of organ initiation (Reinhardt et  
51 al., 2005; Sussex, 1951). A variant on this theme is the proposal that transient auxin  
52 depletion in the adaxial (adjacent to the shoot axis) tissues of leaf primordia promotes  
53 dorsal identity (Qi et al., 2014). In contrast, other studies suggest that dorsoventral  
54 patterning is pre-established, being directly derived from central-peripheral patterning of  
55 the shoot (Hagemann and Gleissberg, 1996; Husbands et al., 2009; Kerstetter et al.,  
56 2001). Supporting this proposal is the observation that transcription factors involved in  
57 both dorsal and ventral cell fate are expressed in the SAM in a central and peripheral  
58 manner respectively and that they control polar differentiation similarly in both contexts  
59 (Emery et al., 2003; McConnell et al., 2001; Yadav et al., 2013). However overall, the  
60 manner in which leaf dorsoventrality is first established in leaves remains unresolved  
61 (Kuhlemeier and Timmermans, 2016).

62

63 To explain how leaf dorsoventrality regulates morphogenesis, Waites and Hudson (1995)  
64 took a cue from wing development in *Drosophila* (Diaz-Benjumea and Cohen, 1993) and  
65 proposed that tissues located along the boundary between dorsal and ventral leaf tissues  
66 act as organizers by producing mobile signals that pattern lamina growth (Waites and  
67 Hudson, 1995). So far, several genes have been identified that are expressed along this  
68 boundary including *KLUH* (Anastasiou et al., 2007) and the *WOX* family transcription  
69 *WOX1*, *WOX2* and *PRS* (Haecker et al., 2004; Matsumoto and Okada, 2001; Nakata et  
70 al., 2012). The *WOX* genes in particular are required for proper lamina growth but are  
71 expressed only at the boundary region suggesting they may promote long-range  
72 patterning (Nakata et al., 2012). However although their ectopic expression can cause  
73 filamentous outgrowths at the leaf base, overall lamina growth is fairly normal (Nakata et  
74 al., 2012) suggesting that additional factors must direct patterning. The *WOX* genes are  
75 also known to regulate the expression of both dorsal and ventrally expressed transcription  
76 factors and miRNAs (Nakata et al., 2012; Zhang et al., 2014; Zhang et al., 2017)  
77 indicating that the *WOX* genes promote lamina growth at least in-part by maintaining the  
78 integrity of dorsal and ventral expression domains. Overall, this leaves the question of  
79 how dorsoventral boundaries actually regulate morphogenesis still unanswered.

80

81 Besides influencing leaf differentiation and shape, genes involved in leaf dorsoventrality  
82 influence leaf position. For instance, *Arabidopsis* plants mutant for the *KANADI* (*KAN*)  
83 genes develop leaves ectopically from the hypocotyl and leaf tissues (Izhaki and  
84 Bowman, 2007) while plants mutant for the Class III *HD-ZIP* (*HD-ZIPIII*) genes develop  
85 leaves from the center of the shoot (Emery et al., 2003). These observations indicate that  
86 the developmental mechanisms that specify leaf dorsoventrality may also be involved in  
87 organ positioning although how these processes relate is unclear.

88

89 In this study we investigate the origin of dorsoventral patterning in detail. We show that  
90 new organs are centered on a pre-patterned boundary region located between the  
91 expression domains of *HD-ZIPIII* and *KAN* genes and that both *KAN* and *HD-ZIPIII*  
92 genes act to repress organogenesis where they are expressed. This leads to a model in  
93 which dorsoventral genes control leaf morphogenesis and positioning by localizing auxin

94 transcriptional response, which then polarizes cells non-cell autonomously (Bhatia et al.,  
95 2016). However, we also show that dynamic auxin levels play a central role in  
96 determining boundary position by spatially organizing HD-ZIPIII and KAN1 expression  
97 in the periphery. By demonstrating that the regulation of these genes by auxin also  
98 governs their response to wounds, our results also provide a parsimonious explanation for  
99 the influence of wounds on leaf dorsoventrality.

100

101

## 102 **Results**

### 103 **Genes involved in leaf dorsoventrality pre-pattern organ formation in the shoot**

104 Although the expression of genes involved in leaf dorsoventrality are known to be  
105 expressed in distinct domains within the shoot, how these domains relate spatially and  
106 temporally to sites of organ inception has not been investigated. To address this question  
107 we used confocal microscopy to monitor the expression of several genes involved in  
108 specifying leaf dorsoventrality in the shoot apical meristem (SAM) in combination with  
109 the auxin efflux carrier PIN-FORMED1 (PIN1) using functional fluorescent protein  
110 reporters. We found proteins involved in leaf dorsoventrality to be localized in non-  
111 overlapping concentric patterns with the dorsal Class III HD-ZIP protein REVOLUTA  
112 (REV) (Otsuga et al., 2001) being detected centrally, as marked by the expression of  
113 REVp::REV-2×YPet (REV-2×YPet), and the ventral protein KANADI1 (KAN1)  
114 (Kerstetter et al., 2001) expressed peripherally, as marked by the expression of  
115 KAN1p::KAN1-2×GFP (KAN1-2×GFP) (Figure 1, A to E). These concentric domains  
116 not only encircled the meristem but also extended contiguously around initiating leaves  
117 and floral bract. Imaging PIN1p::PIN1-CFP (PIN1-CFP) (Gordon et al., 2007a) together  
118 with these reporters revealed regions of high PIN1-CFP expression, marking positions of  
119 organ inception (Heisler et al., 2005; Reinhardt et al., 2003), to be centered on a narrow  
120 region located between the dorsal and ventral domains (Figure 1D-K). This arrangement  
121 was conserved with few cells altering their KAN1 expression status during organogenesis  
122 (Figure 1C arrowhead and Figure 2 A-F). Ventrally expressed MIR165/166 (Kidner and  
123 Martienssen, 2004; Merelo et al., 2016; Nogueira et al., 2007; Yao et al., 2009) also  
124 appeared active in the SAM periphery as marked by a *MIR166Ap::GFPER* reporter and



125 MIR165/166 biosensor (Figure 3A-I), consistent with previous studies (Miyashima et al.,  
126 2013). Both KAN1-2×GFP and *MIR166Ap::GFPER* re-established their expression in the  
127 SAM periphery after organ outgrowth (Figure 1E and Figure 3C arrowheads). As  
128 members of the WOX family of transcription factors including WOX1 and PRS are  
129 expressed at dorsoventral boundaries (Nakata et al., 2012) we imaged functional  
130 translational fusions to both PRS (PRSp::PRS- 2×GFP) and WOX1 (WOX1p:: 2×GFP-  
131 WOX1) to examine their expression in the shoot relative to leaves. We found that  
132 although 2×GFP-WOX1 expression was limited to the margins and middle domain of  
133 leaves (Figure 4A and B) and absent in the inflorescence meristem (Figure 4C), in the  
134 vegetative shoot PRS-2×GFP expression extended from the leaf middle domain to  
135 surround the SAM in a region between the KAN1 and REV expression domains (Figure  
136 4D-H). In the inflorescence meristem however, PRS-2×GFP expression was restricted to  
137 early cryptic bract primordia (Figure 4I and J). In contrast to all genes described so far, a  
138 *FILp::dsRED-N7* marker was expressed in both abaxial and adaxial cells at inception,  
139 consistent with a previous study (Tameshige et al., 2013) (Figure 5). Overall these data  
140 reveal that in many respects although not all, dorsoventral patterning within young leaf  
141 primordia, including the middle region (Nakata et al., 2012), corresponds to and is  
142 contiguous with, the patterning of dorsoventral gene expression in the SAM.

### 143 **The KAN and Class III HD-ZIP genes repress organ initiation where they are** 144 **expressed**

145 The finding that sites of organ inception marked by PIN1 are located between KAN1 and  
146 REV expression domains in the SAM suggest that both KAN1 and REV may act to  
147 repress organ inception where they are expressed. Supporting this proposal, leaves  
148 develop ectopically in *kan1 kan2 kan4* and *rev phb phv* mutants (Izhaki and Bowman,  
149 2007). However it is possible that the HD-ZIP III genes influence organ initiation only  
150 indirectly by promoting SAM formation during embryogenesis (Emery et al., 2003;  
151 Izhaki and Bowman, 2007). To distinguish between these possibilities we induced the  
152 expression of MIR165/166-resistant REV<sub>r</sub>-2×VENUS throughout the epidermis using a  
153 pOp6/LhGR two-component (Samalova et al., 2005) system with the ATML1 promoter  
154 (Sessions et al., 1999) driving LhGR and found that it caused an arrest of organ formation

155 and repression of KAN1-2×GFP in both the vegetative and inflorescence meristems  
156 (Figure 6 A-E). Despite the lack of organs, stem growth for the inflorescence meristem  
157 continued without any obvious change to meristem size, indicating that the phenotype  
158 initially influenced organ initiation (inset in Figure 6E). Similar results were observed  
159 after induction of a short tandem target mimicry construct designed to repress  
160 MIR165/166 activity (Yan et al., 2012) (Figure 6F and G) or after epidermal induction of  
161 MIR165/166-resistant PHAVOLUTA (Figure 6H-J). Similarly, plants expressing KAN1  
162 ectopically in the epidermis also stopped making new organs (Figure 6K and L) and the  
163 inflorescence meristem took on a dome shape before eventually arresting (Figure 6M).  
164 We conclude both the KAN and Class III HD-ZIP genes regulate organ positioning at  
165 least in part by repressing organ initiation where they are expressed.

### 166 **Expression patterns of REV and KAN1 in the shoot regulate leaf positioning and** 167 **morphogenesis**

168 To test whether boundaries between KAN1 and Class III HD-ZIP expression in the SAM  
169 can play an instructive role in positioning new organs and determining their subsequent  
170 dorsoventrality, we induced KAN1-2×GFP expression ectopically at the center of the  
171 SAM using a pOp6/LhGR two-component (Samalova et al., 2005) system and the CLV3  
172 promoter driving LhGR. After KAN1-2×GFP induction, most seedlings initiated several  
173 new leaves before their growth stopped. Confocal imaging of seedlings five days after  
174 stratification (DAS) on dexamethasone (DEX) induction medium revealed that new  
175 organs, marked by high levels of PIN1-CFP expression, formed ectopically at the  
176 perimeter of an enlarged and irregular central domain of induced KAN1-2×GFP  
177 expression, in which REV-2×YPet expression had been repressed (Figure 7A and B).  
178 Although ectopic KAN1-2×GFP was only detected within or bordering organs during  
179 their initiation, REV-2×YPet expression was often restricted during later developmental  
180 stages (Figure 7C-H) indicating that patterns of KAN1 gene expression within the SAM  
181 can influence subsequent organ development. In particular, we noted that the distal  
182 margins of developing leaf primordia always correlated with boundaries of REV  
183 expression within the epidermis, even when REV expression was abnormally restricted  
184 (arrow heads in Figure 7C-H; movie S1). Several classes of phenotype, including leaves

185 with an inverted orientation, could be distinguished at maturity (Figure 7 I-T) that  
186 correlated with the patterns of REV-2×YPet expression observed during early  
187 development. These distinct morphological classes can be explained according to the  
188 configuration of the HD-ZIPIII-KAN boundaries at organ inception. Specifically, we  
189 infer that the number and orientation of boundaries within organ founder cells (as  
190 specified by high auxin levels) determines the configuration of later leaf marginal tissue  
191 (Figure 7P-S).

### 192 **Maximal auxin response is localized to HD-ZIPIII and KAN boundaries**

193 The influence of dorsoventral gene expression on organogenesis suggests that  
194 dorsoventral boundaries may function generally to localize auxin response. In support of  
195 this proposal it has been reported that in the inflorescence meristem the auxin  
196 transcriptional marker DR5 is only responsive to auxin in the shoot periphery (de Reuille  
197 et al., 2006). We examined DR5 expression (Liao et al., 2015) in the vegetative meristem  
198 by examining its expression both in the wild type and after 1-N-Naphthylphthalamic acid  
199 (NPA) treatment at 3 DAS. In mock treated seedlings we found DR5 to be expressed at  
200 the locations of incipient primordia and at the distal tip of existing leaf primordia (Figure  
201 8A and B). In contrast, NPA treated seedlings expressed DR5 in a ring encircling the  
202 SAM prior to organ emergence and in the middle domain or dorsoventral boundary  
203 region of developing leaves (Figure 8C and D). Similar experiments with seedlings  
204 expressing the ratiometric R2D2 intracellular auxin reporter (Liao et al., 2015) revealed a  
205 generally broader distribution of auxin compared to the DR5 transcriptional response,  
206 especially after NPA treatment, where signal was not restricted to the meristem periphery  
207 or leaf tip (Figure 8E-H). These results indicate that like the inflorescence meristem,  
208 auxin transcriptional response outside the periphery of the vegetative meristem appears  
209 repressed. Since we also observed PRS expression localized to the meristem periphery  
210 (Figure 4D), we tested whether PRS as well as WOX1 are auxin inducible and found that  
211 both genes respond to auxin treatment within 12 and 15 hrs respectively although their  
212 response was restricted to the boundary region (Figure 8I-P). Measuring transcript levels  
213 using qPCR indicated that the auxin response for both genes occurs at the transcriptional  
214 level (Figure 8Q).

215 These results not only reveal that general auxin response is maximized at the dorsoventral  
216 boundary but also, that genes already known to be expressed at the boundary are auxin  
217 responsive. Considering our results altogether and the finding that KAN1 represses PRS  
218 and WOX1 in ventral tissues (Nakata et al., 2012), we suggest a general scenario in  
219 which KAN and HD-ZIPIII genes repress auxin response where they are expressed,  
220 leaving a narrow domain of auxin responsive cells in between their expression domains.

### 221 **The absence of HD-ZIPIII and KAN expression in boundary regions may mediate** 222 **boundary function**

223 So far, our results suggest a simple model in which organ formation is localized to  
224 boundary regions due to the local absence of KAN and HD-ZIPIII expression in  
225 boundary cells. We tested this proposal *in silico* by implementing a previous model for  
226 phyllotaxis (Jonsson et al., 2006; Smith et al., 2006), now supported experimentally  
227 (Bhatia et al., 2016), that incorporates the polarization of PIN1 towards cells with high  
228 intracellular auxin concentrations. By assuming that both KAN1 and REV repress auxin-  
229 induced transcription and by including a narrow region of cells located between the  
230 KAN1 and REV expression domains the model was able to self-organize the periodic  
231 formation of auxin maxima along the boundary as predicted, compared to a broader  
232 distribution of maxima when such boundaries are not included (Figure 9A-D; compare  
233 9B to 8D).

### 234 **Auxin organises HD-ZIPIII and KAN expression in the shoot periphery**

235 So far, our results indicate that both HD-ZIPIII and KAN1 suppress auxin-induced gene  
236 expression where they are expressed. However this does not exclude the possibility that  
237 auxin may play a role in patterning HD-ZIPIII and KAN expression. Indeed, REV  
238 expression typically extends towards PIN1 polarity convergence patterns in the meristem  
239 periphery and disappears in axil regions where auxin is depleted, suggesting a direct or  
240 indirect role for auxin in promoting REV expression (Figure 1) (Heisler et al., 2005). In  
241 contrast, a recent study indicated that high auxin levels promote ventral cell fate (Qi et  
242 al., 2014). To investigate any potential regulation of REV and KAN expression by auxin  
243 we treated inflorescence meristems with NAA as well as NPA to prevent rapid auxin

244 redistribution and examined the response of both REV and KAN1. We found that the  
245 region in between the REV and KAN1 domains narrowed due to a slight expansion of  
246 REV expression (Figure 10A and B). This was confirmed by following cells over time  
247 where we found that while more cells expressed REV, KAN expression appeared static  
248 (Figure 10C-H). We observed a similar but a comparatively faster response upon  
249 treatment with 2,4-D (Figure 10-Figure Supplement 1). Apart from changes in REV we  
250 noticed that over the course of 36 hours, KAN1 expression did not appear as expected in  
251 regions separating floral bracts from the meristem (Figure 10B). In vegetative meristems  
252 this was more obvious where contiguous REV expression often appeared between the  
253 meristem and developing leaves where KAN1 expression would normally be expressed  
254 (Figure 11A-H; Movie S2). These results indicate exogenous auxin promotes HD-ZIPIII  
255 expression and represses KAN expression in cells not already expressing KAN1.

256

257 To test whether REV or KAN1 expression depend on endogenous auxin for their patterns  
258 of expression we treated triple marker plants with the TIR1 antagonist auxinole (Hayashi  
259 et al., 2012) and found that after 18 hrs of treatment KAN expression had expanded  
260 slightly toward the meristem center (Figure 12A and B; Figure 12-Figure Supplement  
261 1A-D). As auxinole competes with endogenous auxin for the TIR1 binding pocket, we  
262 attempted to reduce endogenous auxin signaling further by simultaneously treating the  
263 meristems with yucasin (Nishimura et al., 2014) and kyn (He et al., 2011) to block auxin  
264 synthesis. This combination of treatments led to an arrest of organogenesis and “pin”  
265 phenotype as well as a significant expansion and restriction of KAN1 and REV  
266 expression centrally, respectively (Figure 12C and D; Figure 12-Figure Supplement 1E-H  
267 Figure 12-Figure Supplement 2). KAN expression not only expanded into those cells  
268 originally located between the REV and KAN1 domains but also cells that had previously  
269 been expressing REV at high levels. However KAN1 expression remained excluded from  
270 the central most cells of the shoot and established floral bracts and leaf primordia, where  
271 REV expression still remained (Figure 12D; Figure 12-Figure Supplement 2). Extending  
272 the drug treatment time did not lead to a further change in expression. Monitoring the  
273 ratiometric auxin sensor R2D2 in response to a similar combined inhibitor treatment

274 confirmed a strong decrease in overall intracellular auxin levels, including in the central  
275 meristem regions where REV was still expressed (Figure 12 E and F).

276

277 Overall these data indicate that directly or indirectly, dynamic changes in auxin levels  
278 play a central role in regulating dorsal and ventral identities in a way that contrasts with  
279 previous proposals (Qi et al., 2014). Auxin not only triggers HD-ZIPIII expression in the  
280 periphery but also maintains this expression at the expense of KAN1 until a leaf or flower  
281 primordium is established. However, auxin only promotes HD-ZIPIII and represses  
282 KAN1 in cells not already expressing KAN1, i.e. once KAN1 is expressed, it is  
283 maintained even if auxin levels increase. This suggests a scenario in which the boundary  
284 between HD-ZIPIII and KAN expression in the SAM only becomes anchored to the  
285 underlying cells when auxin levels are high, i.e. at organ inception, consistent with our  
286 imaging data.

### 287 **Wounding induced KAN expression in an auxin dependent manner**

288 Since auxin is required to maintain REV at the expense of KAN expression in the  
289 meristem periphery and wounding causes repolarization of PIN1 away from wound sites  
290 (Heisler et al., 2010) resulting in auxin depletion (Landrein et al., 2015), we investigated  
291 whether wounding results in ectopic KAN1 and reductions in REV expression. Firstly,  
292 using a pulsed IR laser to ablate cells adjacent to young organ primordia we confirmed  
293 that auxin levels decrease in the vicinity of wounds by monitoring the expression of the  
294 R2D2 ratiometric marker (Figure 13A and B). Next, we monitored REV, KAN and PIN1  
295 expression in response to such wounds. We found that KAN1 became expressed in cells  
296 adjacent to the wound on either side, regardless of wound orientation with respect to the  
297 SAM (Figure 13C and D; Figure 13-Figure Supplement 1A-H). Such a response argues  
298 against the possibility that ectopic KAN is the result of interruption of a signal emanating  
299 from the meristem that promotes dorsal and represses ventral identity (Sussex, 1955).  
300 Instead, it supports the proposal that KAN1 expression is promoted in the vicinity of  
301 wounds in general, possibly due to low auxin levels. To test this hypothesis, we repeated  
302 these experiments while treating the wounded meristems with combinations of NAA and  
303 NPA over a 48 hr period and found that the induction of KAN1 expression around

304 wounds could be completely eliminated if NAA and NPA were combined (Figure 13E-G;  
305 Figure 13-Figure Supplement 1I-L). Although a similar response to wounding was found  
306 to occur in vegetative meristems, the wound response typically involved a more  
307 substantial reorganization of meristem structure, possibly due to the small size of the  
308 vegetative meristem relative to the wounds (Figure 13-Figure Supplement 1 M-O). When  
309 new leaves subsequently formed, they were properly oriented with respect to the new  
310 meristem organization.

311

## 312 **Discussion**

313 In this study we shed new light on a long-standing question regarding leaf dorsoventrality  
314 in plants – when and how is it established? The early work of Sussex, based on  
315 histological analysis and wounding experiments, suggested that initiating leaf primordia  
316 require an inductive signal from meristem tissues to specify dorsal cell fate (Sussex,  
317 1955). This proposal has been further supported by a more recent study in tomato  
318 (Reinhardt et al., 2005). In contrast, other workers in the field have claimed that  
319 dorsoventrality arises directly from radial patterning of the shoot (Hagemann and  
320 Gleissberg, 1996) and that wounds may disrupt pre-existing polarity (Snow and Snow,  
321 1959). Our results reveal that organs are pre-patterned by domains of KAN and HD-  
322 ZIPIII expression in the shoot. The effect of ectopic KAN1 expression at the center of the  
323 shoot on subsequent leaf positioning and growth is particularly striking and indicates that  
324 the spatial arrangement of HD-ZIPIII and KAN expression present within organ founder  
325 cells is incorporated into organs as they initiate and directs patterns of morphogenesis  
326 (Figure 7P-S; Figure 14). However, the exact configuration of this pre-pattern, including  
327 its propagation into developing organs, is dynamic and depends on changing auxin levels.  
328 While high auxin levels promote HD-ZIPIII and represses KAN this is only true for cells  
329 not already expressing KAN. Hence, at sites of incipient organ formation, where auxin is  
330 concentrated in between the two expression domains, HD-ZIPIII expression is promoted  
331 and maintained in cells adaxial to KAN expression as these cells divide and become  
332 displaced peripherally. At the same time, this high auxin also prevents KAN expression  
333 from expanding into HD-ZIPIII expressing cells, causing the boundary to remain  
334 relatively static with respect to the underlying cells (Figure 14 A). However if auxin



335 levels drop, for instance when PIN1 reverses polarity away from a primordium in adaxial  
336 cells (Heisler et al., 2005; Qi et al., 2014), HD-ZIPIII expression decreases and KAN  
337 expression takes its place (Figure 14B and C). Hence auxin “locks-in” the spatial  
338 arrangement of HD-ZIPIII and KAN expression within organ founder cells at organ  
339 inception until a later stage when the pattern becomes auxin independent. Elsewhere  
340 however, the pattern is dynamic.

341 Overall these results imply that the dorsoventral patterning of organs results from a four-  
342 step process: (i) signals during embryonic development establish concentric patterns of  
343 Class III HD-ZIP and KAN gene expression; (ii) the boundary between these domains  
344 helps to define sites for auxin-dependent organogenesis i.e. the meristem peripheral zone;  
345 (iii) As organs form, dynamic auxin levels modulate the patterns of HD-ZIPIII and KAN  
346 expression, thereby helping to position new organs and establish their dorsoventrality;  
347 (iv) patterns of HD-ZIPIII and KAN gene expression within organs are stabilized and  
348 dictate future patterns of morphogenesis.

349 The regulation of HD-ZIPIII and KAN expression by auxin is not only relevant to  
350 understanding wild type organ development but also for understanding the reorganization  
351 of tissue types in response to wounds. Wounds in the meristem outer cell layer  
352 specifically alter cell polarities such that PIN1 becomes polarized away from wounds in  
353 adjacent cells (Heisler et al., 2010), leading to auxin depletion (Landrein et al., 2015). As  
354 mentioned above, since the 1950s wounding has also been associated with changes in leaf  
355 dorsoventrality (Sussex, 1955). Specifically, wounds located between the meristem and  
356 initiating organ were found to promote leaf ventralization and a loss of lamina shape  
357 suggesting that the establishment of dorsal cell fate requires an inductive signal from the  
358 meristem, which the wound interrupted (Sussex, 1955). Our observations now indicate  
359 rather, that during organ establishment, HD-ZIPIII expression depends on high levels of  
360 auxin, which wounding disrupts. Thus as suggested previously, the meristem “acts by  
361 maintaining in the leaf-forming zone some polarized micro-structure which collapses  
362 without it” (Snow, 1959).

363 The conclusions stated above contrast with those of another study reporting that high  
364 levels of auxin inhibit dorsal fate and promote ventral cell fate (Qi et al., 2014). These  
365 findings were based on auxin application experiments in tomato that resulted in the  
366 ventralization of leaves as well as the observation that *Arabidopsis pin1* and *pid rev*  
367 double mutants produce trumpet or rod-shaped leaves. Although our results  
368 cannot easily explain the tomato data, since high auxin levels are required to maintain  
369 REV expression during organ establishment, we would expect that in *pin* and *pid*  
370 mutants, lower auxin levels may well result in lower expression levels of REV and  
371 possibly other Class III HD-ZIPs, leading to leaf ventralization as reported in these  
372 mutant backgrounds (Qi et al., 2014). Further auxin application experiments in tomato  
373 that include an analysis of gene expression and auxin level changes may clarify the  
374 relationship between auxin and dorsoventral patterning in tomato compared to  
375 *Arabidopsis*.

376 **How do DV boundaries control organ position and shape? Both our data as well as**  
377 **data from previous studies suggest this is through the regulation of auxin**  
378 **perception. For instance, organ initiation requires high auxin levels but auxin can**  
379 **only trigger organogenesis in the peripheral zone (Reinhardt et al., 2000) where the**  
380 **HD-ZIPIII/KAN boundary occurs. A similar relationship holds for leaves where**  
381 **auxin application results in growth but only from the leaf margins, again**  
382 **corresponding to a DV boundary (Koenig et al., 2009). We further show that the**  
383 **localization of auxin response to DV boundaries applies generally, i.e. DR5**  
384 **expression appears higher at such boundaries compared to the broader predicted**  
385 **auxin distribution, as marked by R2D2. How is this restriction achieved? Imaging**  
386 **data reveals that the locations of PIN1 polarity convergences correspond to a region**  
387 **of cells in between the expression domains of HD-ZIPIII and KAN where their**  
388 **expression is low or absent. Given our results as well as genetic and molecular data**  
389 **indicating that both the HD-ZIPIII and KAN genes repress auxin activity (Huang et**  
390 **al., 2014; Merelo et al., 2013; Zhang et al., 2017), we propose that this localized**  
391 **absence of expression results in a local de-repression of auxin-induced transcription.**  
392 **Such localized auxin activity has recently been shown to orient cell polarity,**

393 including microtubule orientations, in a non-cell autonomous manner (Bhatia et al.,  
394 2016). Hence, we suggest that the proposed ability of dorsoventral boundaries to act  
395 as organizers analogous to those of the *Drosophila* wing (Diaz-Benjumea and Cohen,  
396 1993; Waites and Hudson, 1995) rests in-part on their ability to orient cell polarity  
397 non-cell autonomously by localizing auxin activity (Figure 14D). The resulting  
398 growth may either occur in the periodic fashion along the boundary typical of  
399 phyllotaxis and complex leaves, or in a more continuous manner typical of simple  
400 leaves, depending on the strength of auxin transport or other modifications to the  
401 cell polarity feedback system (Bilsborough et al., 2011; Koenig et al., 2009).  
402 Investigating the dynamic consequences of directly juxtaposing REV and KAN  
403 expression should enable the testing of these hypotheses as well as lead to a better  
404 understanding of how auxin responsive boundary domains are first established.

## 405 **Materials and Methods**

### 406 **Plant material**

407 Plants were grown on soil at 22 °C in continuous light-conditions and cultivated either on  
408 soil or on GM medium (1 % sucrose, 1× Murashige and Skoog basal salt mixture, 0.05%  
409 MES 2-(MN-morpholino)-ethane sulfonic acid, 0.8 % Bacto Agar, 1 % MS vitamins, pH  
410 5.7 with 1 M potassium hydroxide solution).

### 411 **Construction of Transgenes**

412 Multiply transgenic lines were generated by *Agrobacterium*-mediated transformation into  
413 stable transgenic lines or by genetic crossing. The *FILp::dsREDN7* and *PIN1p::PIN1-*  
414 *GFP* transgenes have been described elsewhere (16). *pREV::REV-2×VENUS* in the T-  
415 DNA vector *pMLBART* (Gleave, 1992) is a modification of *pREV::REV-VENUS* (Heisler  
416 et al., 2005) that contains a translational fusion to 2 tandem copies of the fluorescent  
417 protein VENUS (Nagai et al., 2002). *REVp::REV-2×Ypet* containing a C-terminal fusion  
418 to the 2× Ypet (Nguyen and Daugherty, 2005) in *pMOA36* T-DNA (Barrell and Conner,  
419 2006) was transformed into a *PINp::PIN1-CFP* line (Gordon et al., 2007b). The  
420 *KAN1p::KAN1-2×GFP* transgene in *pMOA34* T-DNA was created by amplifying 8.7 kb  
421 of *KAN1* (At5g16560) genomic sequences with primers KAN1g F and KAN1g R

422 (Supplemental Data File 1A) as a translational fusion to a 9 Ala linker and 2×GFP  
423 followed by *OCS* terminator sequences. When transformed into *kan1-2 kan2-1*  
424 segregating plants, this construct complements the mutant phenotype. The triple marker  
425 line was generated by transforming *KAN1p::KAN1-2×GFP* into a *REVp::REV-2×Ypet*;  
426 *PINI1p::PINI-CFP* transgenic line. *KAN1p::KAN1-2×CFP* or *KAN1p::KAN1-*  
427 *2×Ypet* containing a fusion to 2 copies of CFP or Ypet, respectively, were constructed  
428 similarly. *KAN1p::KAN1-2×Ypet* and *PINI1p::PINI-GFP* were combined in T-DNA  
429 vector *BGW* (Karimi et al., 2002) by Gateway technology (Invitrogen) for generation of a  
430 double marker transgenic line.

431 The *KAN1* cDNA was amplified by PCR with primers K1 cDNA F and K1 cDNA R to  
432 generate C-terminal translational fusion to a 9 Ala linker followed by single GFP or  
433 2×GFP followed by pea *rbcS E9* terminator sequence (Zuo et al., 2001) and cloned into  
434 the pOp6/LhGR two-component system (Craft et al., 2005) for dexamethasone-inducible  
435 misexpression.

436 An *ATML1p::LhGR* driver containing 3.4 kb of the L1-specific *ATML1* gene  
437 (At4g21750) fused to the chimeric LhGR transcription factor and a *6Op::KAN1-GFP*  
438 expression construct in a *pSULT* sulfadiazine-resistant T-DNA vector (*ATML1>>KAN1-*  
439 *GFP*) was generated. The *pSULT* T-DNA vector was derived from *pMLBART* by  
440 replacing the *NOSp::BAR* gene with *1'-2'p::SUL* (Rosso et al., 2003), a plant selectable  
441 marker that confers resistance to sulfadiazine herbicide to create *pSULT. A*

442 *CLV3p::LhGR* driver containing 1.49 kb of upstream regulatory sequences was PCR  
443 amplified with primers CLV3p F and CLV3p R along with 1.35 kb of downstream  
444 regulatory sequences with primers CLV3utr F and CLV3utr R was combined with  
445 *6Op::KAN1-2×GFP* in *pSULT* T-DNA vector (*CLV3>>KAN1-2×GFP*).

446 *ATML1>>REVr-2×VENUS* is a sulfadiazine-resistant T-DNA vector to misexpress  
447 microRNA resistant REV-2×VENUS fusion, where *6Op::REVr-2×VENUS* was  
448 constructed by cloning a 1148 bp *BamHI-XcmI* microRNA resistant REV cDNA (a gift  
449 from J. Bowman) harbouring two previously characterized silent mutations that disrupt  
450 the binding of MIRNA 165/166 to the coding sequence of *REV* as previously described  
451 (Emery et al., 2003) downstream of the *6Op* and in frame with the wild type *REV-*  
452 *2×VENUS* coding sequences.

453 *miR166Ap::GFPER* T-DNA construct was kindly provided by K. Nakajima (Miyashima  
454 et al., 2011). The MIR165/166 biosensor was created based on the design presented by  
455 Smith Z. R. et al. (Smith and Long, 2010) in the *AlcR/AlcA* expression system (Roslan et  
456 al., 2001) for ethanol-inducible expression. The sequences conferring MIR165/166  
457 sensitivity from the *REV* coding sequence (*REV*) and the sequences conferring  
458 MIR165/166 insensitivity (*REVR*) were fused to *mCherry* (Shaner et al., 2004) with  
459 endoplasmic reticulum localization sequences *mCherryER*, which was synthesized de  
460 novo (Genscript). The MIR165/166-*mCherryER* biosensors (both biosensor and control)  
461 were cloned as *HindIII-BamHI* fragments downstream of the *AlcA* regulatory sequences  
462 in the *UBQ10p:AlcR\_BJ36* plasmid vector. *UBQ10p:AlcR* was constructed by cloning the  
463 *UBQ10* promoter 2 kb fragment upstream of *AlcR* and the *OCS* terminator. Both  
464 *UBQ10p::AlcR* and *AlcA::REV-mCherryER* or *AlcA::REVR-mCherryER* components  
465 were combined in the T-DNA vector *pMOA34*.  
466 The *WOX1p::2×GFP-WOX1* construct in *pMLBART* T-DNA vector was generated as  
467 follows: 2.2 kb of *WOX1* (*At3g18010*) upstream promoter sequence was amplified with  
468 primers *WOX1p F* and *WOX1p R* and cloned using restriction enzymes *KpnI* and  
469 *BamHI*. 3.6 kb of *WOX1* coding sequence plus 1.65 kb 3'-regulatory sequences was  
470 amplified from wild-type Col-O genomic DNA with the primers *WOX1g F* and *WOX1g*  
471 *R* and cloned using restriction enzymes *BglIII* and *SpeI*. 2 copies of *GFP* were inserted in  
472 frame at the start of the *WOX1* coding sequence at the *BamHI* and *BglIII* sites. A double  
473 marker was generated by transforming the *WOX1p::2×GFP-WOX1* into a *PIN1p::PINI-*  
474 *CFP* transgenic line.  
475 The *PRSp::PRS-2×GFP* construct in *pMOA34* T-DNA vector was made by amplification  
476 of 3.9 kb *PRS* (*At2g28610*) genomic sequence (similar to (Shimizu et al., 2009)) with  
477 primers *PRSp F* and *PRSp R* to create a C-terminal fusion to *2×GFP* followed by *OCS*  
478 3' regulatory sequences. Marker combinations were generated by transforming the  
479 *PRSp::PRS-2×GFP* into either a *PIN1p::PINI-CFP* transgenic line or into *REVp::REV-*  
480 *2×YPET PIN1p::PINI-CFP* line. (*PRSp::PRS-2×GFP*) and (*KAN1p::KANI-2×CFP*)  
481 were combined in T-DNA vector *BGW* (Karimi et al., 2002) by Gateway technology  
482 (Invitrogen) for generation of a double marker transgenic lines.

483 A short tandem target mimic (STTM) construct to target MIR165/166 (Yan et al., 2012)  
484 was generated in the *pOp6/LhGR* two-component system for dexamethasone-inducible  
485 expression with a *UBQ10p::GRLh* driver. *STTM MIR165/166-88* sequence (Yan et al.,  
486 2012) was synthesized de novo (Genscript) and cloned downstream of  $6\times Op$  to create  
487  $6\times Op::STTM\ 165/166$ . Both components were combined in a sulfadiazine T-DNA  
488 *pSULT (UBQ10>>STTM 165/166)*.

489 *ATML1>>PHVr* is a sulfadiazine-resistant T-DNA vector containing a mutated version  
490 of *PHV* cDNA (a gift from J. Bowman) with a Gly to Asp amino acid change that  
491 disrupts the miRNA165/166 binding site in the *PHV* gene (McConnell et al., 2001).  
492  $6\times Op::PHVr$  was constructed by cloning a 2.6 kb *XhoI-BamHI PHVr* cDNA downstream  
493 of  $6\times Op$  and upstream of *pea3A* terminator sequences. *ATML1>>PHVr* was transformed  
494 into a *REVp::REV-2xYPet; PIN1p::PIN1-CFP* transgenic line.

495 *DR5-3xVENUS v2* reporter gene (Liao et al., 2015) was a generous gift from D. Weijers.  
496 The line *R2D2 PIN1p::PIN1-GFP* was described previously (Bhatia et al., 2016).

#### 497 **Dexamethasone induction**

498 For inducible gene perturbations in the vegetative SAM, seeds were germinated directly  
499 on GM medium containing 10  $\mu$ M Dexamethasone (Sigma, stock solution was prepared  
500 in Ethanol).. Seedlings were then dissected for imaging at 4 DAS, 5 DAS or 7 DAS  
501 depending on the experiment. For DEX induction in the IM, 10  $\mu$ M DEX solution  
502 containing 0.015% Silwet L-77 was applied to the IM every second day three times.  
503 Inflorescences were then dissected and imaged. The number of T2 inducible transgenic  
504 lines that exhibit the presented phenotypes and the frequencies of phenotypes amongst  
505 imaged plants is shown in Supplemental Data File 1B and associated caption.

#### 506 **Confocal Microscopy**

507 Plants were dissected for imaging as previously described (Bhatia et al., 2016; Heisler  
508 and Ohno, 2014) and imaged with a Leica SP5 Upright confocal microscope using an  
509 Argon laser. The objective used was a water-immersion HCX IRAPO L25x/0.95 W  
510 (Leica). Excitation for CFP is 458 nm, GFP is 488 nm, YFP (Ypet and VENUS) is 514  
511 nm and tdTomato is 561 nm. Emission signal were collected at 460-480 nm for CFP,



512 490-512nm for GFP, 516-550 nm for YFP (YPet and VENUS), and 570-620 nm for  
513 tdTomato. The resulting z-stacks were processed using the Dye Separation (Channel  
514 mode or automatic mode) function available in the LAS AF program in order to separate  
515 the GFP channel from the YFP (Ypet or VENUS) channel. Three software packages:  
516 LAS AF from Leica, Imaris 8.0.2 by Bitplane and FIJI (<https://fiji.sc>) were used for data  
517 analysis. Ratios for R2D2 were calculated as described previously (Bhatia et al., 2016).

#### 518 **Measurement of distance between organs**

519 For distance measurements between oppositely positioned leaves on plants transgenic for  
520 inducible KAN1 (*CLV3>>KANI-2×GFP* – see above) the measurement tool from Imaris  
521 8.0.2 (Bitplane) was used. For comparisons to control, untreated seedlings grown on GM  
522 were compared to seedlings grown on DEX for 5 days. t-Test was performed using Excel.

#### 523 **Chemical treatments for auxin depletion in the inflorescence meristems**

524 500mM stock solutions of auxinole, yucasin and L-Kynurenine were prepared separately  
525 in DMSO. The stocks were diluted in 1mL 0.1M phosphate buffer in sterile water to  
526 make a working solution containing all the three drugs (0.2μL of each stock) to a final  
527 concentration of 100mM each. The final concentration of DMSO in the working solution  
528 containing all the three drugs was 0.06%.

529 Treatments were carried out on the inflorescence meristems of whole plants transplanted  
530 from soil to boxes containing GM medium supplemented with vitamins. The older  
531 flowers were removed as described (Heisler and Ohno, 2014). The plants were chosen  
532 such that the stem of the meristem was a few millimeters above the rosette to prevent the  
533 drug solution from dispersing into the surrounding medium. After imaging, the meristems  
534 were carefully dried using a thin strip of sterile filter paper to remove excess water.  
535 Approximately 50μL of the drug solution was added directly to the meristem, drop-wise.  
536 The meristems were treated only once in a time course of 12-18 hours.

#### 537 **NPA treatment on seedlings carrying R2D2 and DR5 markers**

538 Seedling aged 3 DAS were dissected to expose the meristem and the first leaf pair as  
539 described (Bhatia et al., 2016). After imaging, seedlings were transferred to new GM



540 medium containing plates and blotted dry with thin strips of sterile paper. 5-10 $\mu$ L of 100  
541  $\mu$ M NPA in sterile water (100 mM stock in DMSO) was added directly to the dissected  
542 seedlings every twenty-four hours for three days in total.

#### 543 **Auxin treatment on seedlings carrying PRS and WOX1 markers**

544 Seedlings aged 4DAS (days after stratification) were dissected to expose the meristem  
545 and the first leaf pair as described (Bhatia et al., 2016). 5mM NAA (1M stock in 1M  
546 KOH) solution was prepared in liquid GM medium. Seedlings were then immersed in  
547 100 $\mu$ L of NAA containing medium in individual wells in 96 well plate and grown under  
548 continuous light without shaking for 12 hours.

#### 549 **2,4-D treatment in the IMs expressing REV and KAN markers**

550 For treatments with 2,4-D, the inflorescence meristems were first imaged and then the  
551 treated with a few drops of 100  $\mu$ M 2,4-D combined with 0.015% Silwet L-77. Apices  
552 were then imaged again 24 hrs later.

553

#### 554 **NAA, NPA and combined NAA and NPA treatments**

555 For treatments on the vegetative meristems and the inflorescence, 3DAS old seedlings or  
556 the young inflorescences of plants expressing REV, KAN and PIN1 markers were  
557 dissected and imaged first. Samples were then treated with a combined solution of 100  
558  $\mu$ M NPA and 5mM NAA ( both diluted in water) or 100  $\mu$ M NPA alone or 5mM NAA  
559 alone. Samples were imaged and treated every 24hours for 72 hours in total.

560

#### 561 **Pulsed Laser ablations.**

562 Laser ablations on the inflorescence meristems were carried out using the Mai Tai multi-  
563 photon laser from Spectra Physics, which was controlled with LEICA SP5 confocal  
564 software. Z-stacks were acquired prior to ablation. Single cells were targeted one after  
565 the other using bleach point mode. Ablations were carried out at 800nm with an output  
566 power of  $\sim$ 3W. Each pulse was shot for 1-15 milliseconds. Usually ablations were

567 accomplished within 1-3 bursts of the laser. Ablated cells could be visually identified as  
568 their nuclei exploded resulting in unusual auto fluorescence. Z stacks were acquired  
569 immediately after the ablations.

### 570 **Auxin and auxin plus NPA combined treatments on ablated inflorescence meristems**

571 After ablations, the meristems were carefully blotted dry using thin strips of sterile filter  
572 paper. 20 $\mu$ L 5mM NAA in sterile water (0.5M stock in 1M KOH) or 20 $\mu$ L of a solution  
573 containing 5mM NAA and 100 $\mu$ M NPA in sterile water (100mM NPA stock in DMSO)  
574 or mock solution were added directly to the meristems every 24 hours for 48 hours in  
575 total.

### 576 **Model for auxin and PIN1 dynamics**

577 We developed a computational model to understand how interplay between the HD-  
578 ZIPIII and KAN pattern and PIN1 dynamics can influence auxin transport and primordia  
579 initiation. The model introduces a dependence on KANADI and REVOLUTA into  
580 previous models describing PIN1 and auxin dynamics (Bhatia et al., 2016; Heisler et al.,  
581 2010; Heisler and Jönsson, 2006; Jonsson et al., 2006; Sahlin et al., 2009). In the model,  
582 auxin resides in cell compartments and is able to move between cells either via active  
583 transport mediated by PIN1 proteins or passively via a diffusion-like process. PIN1  
584 proteins cycle between cytosol and membrane compartments and a quasi-equilibrium  
585 model is used for determining its membrane localization at any time point. Auxin  
586 generates a signal able to polarise PIN1 in neighboring cells, i.e. a high auxin  
587 concentration increases the amount of PIN1 proteins in the neighboring cell membrane  
588 facing that cell. The molecule X in our model acts as a mediator of the signalling between  
589 auxin and PIN1, and the signal has previously been interpreted as a molecular (Jonsson et  
590 al., 2006), or mechanical stress signal (Heisler et al., 2010). In the model, the signal X is  
591 activated by auxin, and repressed by KAN and REV. The equations governing the  
592 dynamics of the molecules are

$$593 \quad \frac{dA_i}{dt} = c_A - d_A A_i + \frac{1}{V_i} \left[ D \sum_{j \in \{N_i\}} a_{ij} (A_j - A_i) + T \sum_{j \in \{N_i\}} a_{ij} (P_{ji} A_j - P_{ij} A_i) \right],$$

$$\begin{aligned}
 594 \quad & \frac{dP_i^{[tot]}}{dt} = c_P - d_P P_i^{[tot]}, \\
 595 \quad & \frac{dX_i}{dt} = V_X \frac{A_i^{n_{XA}}}{(K_{XA}^{n_{XA}} + A_i^{n_{XA}})} \frac{K_{XR}^{n_{XR}}}{(K_{XR}^{n_{XR}} + R_i^{n_{XR}})} \frac{K_{XK}^{n_{XK}}}{(K_{XK}^{n_{XK}} + K_i^{n_{XK}})} - d_X X_i,
 \end{aligned}$$

596

597 where  $A_i$  is the auxin concentration and  $X_i$  is the level of the signalling molecule in cell  $i$ .  
 598  $\{N_i\}$  is the set of cells neighboring cell  $i$ ,  $V_i$  is the cell volume of cell  $i$ , and  $a_{ij} = a_{ji}$  is the  
 599 cell wall area for the wall section between cells  $i$  and  $j$ .  $P_i^{[tot]}$  is the total  
 600 PIN1 concentration in the cytosol and membrane compartments of cell  $i$ . Membrane-  
 601 bound PIN1 appears in the equation as  $P_{ij}$ , which is the PIN1 concentration in the  
 602 membrane compartment of cell  $i$  that faces cell  $j$ . A simple linear feedback between the  
 603 signal  $X_j$  and  $P_{ij}$  is used and a quasi-stable assumption, introduced in Jönsson *et. al.*  
 604 (2006), leads to

605

$$606 \quad P_{ij} = \frac{P_i^{[tot]}[(1 - k_p) + k_p X_j]}{f_p + \sum_{k \in \{N_i\}} [(1 - k_p) + k_p X_k]}$$

607

608 where  $f_p = k_n/k_x$  is the ratio of endocytosis and exocytosis rates and  $k_p$  sets the relation  
 609 between symmetric and polarized exocytosis ( $dP_{ij}/dt = k_x[(1-k_p) + k_p X_j] P_i - k_n P_{ij}$ , where  
 610  $P_i$  is the PIN1 in the cytosol compartment). The feedback between auxin and PIN1 is  
 611 identical to previous models if the KAN and REV factors in the  $dX_i/dt$  equation are 1 (e.g.  
 612 by setting KAN and REV to zero in all cells), while the polarising signal becomes  
 613 reduced in regions where KAN and/or REV are expressed. This effect tunes the  
 614 interaction between the dorsoventral patterning and PIN1/auxin dynamics (cf. Figure. 8B  
 615 and D).

616 The model was simulated using the in-house developed software organism/tissue  
 617 (<http://dev.thep.lu.se/organism/>, available upon request). Files defining the model with  
 618 parameter values (Supplemental Data File 1C) and initial configuration of (static) cell  
 619 geometries and KAN and REV expression domains are provided as Supplemental  
 620 Information. The simulations use a 5th order Runge-Kutta solver with adaptive step size

621 (William H. Press, 2007), and initial auxin, PIN1 and X concentrations are set to zero in  
622 all compartments.

623

### 624 **Generation of geometrical template**

625 The model defined above was run on a template containing a predefined KAN/REV  
626 pattern (provided as Supplemental Data File 1C, Figure 9C). The geometry of the  
627 template was generated by a combination of cell/wall growth and mechanical interactions  
628 together with a shortest path division rule (Sahlin and Jonsson, 2010). A KAN/REV  
629 pattern was generated by the equations

630

$$631 \quad \frac{dK_i}{dt} = V_K \frac{r_i^{n_K}}{K_K^{n_K} + r_i^{n_K}} - d_K K_i,$$

$$632 \quad \frac{dR_i}{dt} = V_R \frac{r_i^{n_R}}{K_R^{n_R} + r_i^{n_R}} - d_R R_i.$$

633

634 This system was run to equilibrium on the above-mentioned template. In the above  
635 equations  $r_i$  is the distance of cell  $i$  from the center of the template. The parameters were  
636 set to  $V_K=V_R=d_K=d_R=1$ ,  $K_K=30$ ,  $K_R=25$ ,  $n_K=n_R=20$ . These parameters are set such that  
637 two distinct domains are created, with a small overlap of low KAN and REV  
638 concentrations in the boundary between these regions. To make the transition of KAN  
639 concentrations between domains sharper, KAN concentrations were set to 0 (1) if  $K_i \leq 0.5$   
640 ( $>0.5$ ).

641

### 642 **Real time PCR**

643 4 day-old wild-type Ler seedlings were immersed into 5mM NAA solution in liquid GM  
644 medium, and grown under continuous light without shaking for 15 hours. Cotyledons,  
645 hypocotyl, and roots were removed under dissecting scope, and only shoot meristem and  
646 the first pair of leaves were collected and immediately frozen in liquid nitrogen. Each  
647 biological replicate, represents tissue from 10-15 individual seedlings. Five biological  
648 replicates were collected for both mock and NAA treatment. RNeasy Mini kit (Qiagen)  
649 was used according to manufacturer's instruction for RNA extraction. 1 microgram of

650 RNA was used for cDNA preparation using Super script III reverse transcriptase for Q-  
651 PCR analysis. Q-PCRs were performed in a StepOne Plus Real Time PCR system thermo  
652 cycler (The applied bio systems) using 20 $\mu$ l of PCR reaction containing 10  $\mu$ L of SYBR  
653 Green mix (Roche), 1 $\mu$ l of primer mix (10 $\mu$ m), 2 $\mu$ l of 1:10 diluted cDNA and 7  $\mu$ l of  
654 water. Transcript levels were normalized to ACTIN2 transcript levels. Data was analyzed  
655 using the 2- $\Delta\Delta$ CT method. A freely available online tool was used for analysis using an  
656 unpaired t-test of the RT-PCR results: [http://graphpad.com/data-analysis-resource-](http://graphpad.com/data-analysis-resource-center/)  
657 [center/](http://graphpad.com/data-analysis-resource-center/). For p-value calculation, data entry format with mean, SD and N was used.  
658 Measurements and calculations for all replicates are provided in Source Data File for  
659 Figure 8.

660

661

## 662 **Acknowledgements**

663 We thank M. E. Byrne for helpful feedback and ideas on the manuscript. We thank J.  
664 Bowman for helpful discussions as well as for plasmids containing REVr and PHVr  
665 cDNAs. We thank D. Weijers and C. Y. Liao for a plasmid containing  
666 pDR5v2::ntdTomato; K. Nakajima for the T-DNA construct of miR166Ap::GFPER, Dr  
667 Atsushi Miyawaki from RIKEN Brain Science Institute for the VENUS fluorescent  
668 protein which was obtained through an MTA. The E.M.M. laboratory is supported by  
669 funds from the Howard Hughes Medical Institute and the Gordon and Betty Moore  
670 Foundation (through grant GBMF3406). The research leading to these results received  
671 funding from the Australian Research Council (M.G.H.) and European Research Council  
672 under the European Union's Seventh Framework Programme (FP/2007-2013) / ERC  
673 Grant Agreement n. 261081 (M.G.H.), as well as the People Programme (Marie Curie  
674 Actions) under REA grant agreement n. 255089 (P.S.). The work was also supported by:  
675 the European Molecular Biology Laboratory (X.Y., M.P.C., C.O., P.S, N.B., H.R. and  
676 M.G.H.); the EMBL International PhD Programme (X.Y., N.B. and M.P.C.); Gatsby  
677 Charitable Foundation (GAT3395/PR4) (H.J) and Swedish Research Council (VR2013-  
678 4632) (H.J). The authors declare no competing financial interests. Supplement contains  
679 additional data and movie. We declare there are no competing interests.

680

681

682

683

684 **References**

685

- 686 **Anastasiou, E., Kenz, S., Gerstung, M., MacLean, D., Timmer, J., Fleck, C. and**  
687 **Lenhard, M.** (2007). Control of plant organ size by KLUH/CYP78A5-dependent  
688 intercellular signaling. *Dev Cell* **13**, 843-856.
- 689 **Barrell, P. J. and Conner, A. J.** (2006). Minimal T-DNA vectors suitable for  
690 agricultural deployment of transgenic plants. *Biotechniques* **41**, 708-710.
- 691 **Bhatia, N., Bozorg, B., Larsson, A., Ohno, C., Jonsson, H. and Heisler, M. G.** (2016).  
692 Auxin Acts through MONOPTEROS to Regulate Plant Cell Polarity and Pattern  
693 Phyllotaxis. *Curr Biol* **26**, 3202-3208.
- 694 **Bilsborough, G. D., Runions, A., Barkoulas, M., Jenkins, H. W., Hasson, A.,**  
695 **Galinha, C., Laufs, P., Hay, A., Prusinkiewicz, P. and Tsiantis, M.** (2011).  
696 Model for the regulation of Arabidopsis thaliana leaf margin development. *Proc*  
697 *Natl Acad Sci U S A* **108**, 3424-3429.
- 698 **Craft, J., Samalova, M., Baroux, C., Townley, H., Martinez, A., Jepson, I., Tsiantis,**  
699 **M. and Moore, I.** (2005). New pOp/LhG4 vectors for stringent glucocorticoid-  
700 dependent transgene expression in Arabidopsis. *Plant J.* **41**, 899-918.
- 701 **de Reuille, P. B., Bohn-Courseau, I., Ljung, K., Morin, H., Carraro, N., Godin, C.**  
702 **and Traas, J.** (2006). Computer simulations reveal properties of the cell-cell  
703 signaling network at the shoot apex in Arabidopsis. *Proc Natl Acad Sci U S A*  
704 **103**, 1627-1632.
- 705 **Diaz-Benjumea, F. J. and Cohen, S. M.** (1993). Interaction between dorsal and ventral  
706 cells in the imaginal disc directs wing development in Drosophila. *Cell* **75**, 741-  
707 752.
- 708 **Emery, J. F., Floyd, S. K., Alvarez, J., Eshed, Y., Hawker, N. P., Izhaki, A., Baum,**  
709 **S. F. and Bowman, J. L.** (2003). Radial patterning of Arabidopsis shoots by class  
710 III HD-ZIP and KANADI genes. *Curr Biol* **13**, 1768-1774.
- 711 **Gleave, a. P.** (1992). A Versatile Binary Vector System with a T-DNA Organizational-  
712 Structure Conducive to Efficient Integration of Cloned DNA into the Plant  
713 Genome. *Plant Molecular Biology* **20**, 1203-1207.
- 714 **Gordon, S. P., Heisler, M. G., Reddy, G. V., Ohno, C., Das, P. and Meyerowitz, E.**  
715 **M.** (2007a). Pattern formation during de novo assembly of the Arabidopsis shoot  
716 meristem. *Development* **134**, 3539-3548.
- 717 **Gordon, S. P., Heisler, M. G., Reddy, G. V., Ohno, C., Das, P. and Meyerowitz, E.**  
718 **M.** (2007b). Pattern formation during de novo assembly of the Arabidopsis shoot  
719 meristem. *Development* **134**, 3539-3548.
- 720 **Haecker, A., Gross-Hardt, R., Geiges, B., Sarkar, A., Breuninger, H., Herrmann, M.**  
721 **and Laux, T.** (2004). Expression dynamics of WOX genes mark cell fate

- 722 decisions during early embryonic patterning in *Arabidopsis thaliana*. *Development*  
723 **131**, 657-668.
- 724 **Hagemann, W. and Gleissberg, S.** (1996). Organogenetic capacity of leaves: The  
725 significance of marginal blastozones in angiosperms. *Plant Syst. Evol.* **199**, 121-  
726 152.
- 727 **Hayashi, K., Neve, J., Hirose, M., Kuboki, A., Shimada, Y., Kepinski, S. and Nozaki,**  
728 **H.** (2012). Rational design of an auxin antagonist of the SCF(TIR1) auxin  
729 receptor complex. *ACS chemical biology* **7**, 590-598.
- 730 **He, W., Brumos, J., Li, H., Ji, Y., Ke, M., Gong, X., Zeng, Q., Li, W., Zhang, X., An,**  
731 **F., et al.** (2011). A small-molecule screen identifies L-kynurenine as a  
732 competitive inhibitor of TAA1/TAR activity in ethylene-directed auxin  
733 biosynthesis and root growth in *Arabidopsis*. *Plant Cell* **23**, 3944-3960.
- 734 **Heisler, M. G., Hamant, O., Krupinski, P., Uyttewaal, M., Ohno, C., Jonsson, H.,**  
735 **Traas, J. and Meyerowitz, E. M.** (2010). Alignment between PIN1 polarity and  
736 microtubule orientation in the shoot apical meristem reveals a tight coupling  
737 between morphogenesis and auxin transport. *PLoS Biol* **8**, e1000516.
- 738 **Heisler, M. G. and Jönsson, H.** (2006). Modeling Auxin Transport and Plant  
739 Development. *Journal of Plant Growth Regulation* **25**, 302-312.
- 740 **Heisler, M. G. and Ohno, C.** (2014). Live-imaging of the *Arabidopsis* inflorescence  
741 meristem. In *Flower Development*, pp. 431-440: Springer.
- 742 **Heisler, M. G., Ohno, C., Das, P., Sieber, P., Reddy, G. V., Long, J. A. and**  
743 **Meyerowitz, E. M.** (2005). Patterns of auxin transport and gene expression  
744 during primordium development revealed by live imaging of the *Arabidopsis*  
745 inflorescence meristem. *Current Biology* **15**, 1899-1911.
- 746 **Huang, T., Harrar, Y., Lin, C., Reinhart, B., Newell, N. R., Talavera-Rauh, F.,**  
747 **Hokin, S. A., Barton, M. K. and Kerstetter, R. A.** (2014). *Arabidopsis*  
748 KANADII acts as a transcriptional repressor by interacting with a specific cis-  
749 element and regulates auxin biosynthesis, transport, and signaling in opposition to  
750 HD-ZIPIII factors. *Plant Cell* **26**, 246-262.
- 751 **Husbands, A. Y., Chitwood, D. H., Plavskin, Y. and Timmermans, M. C.** (2009).  
752 Signals and prepatterns: new insights into organ polarity in plants. *Genes Dev* **23**,  
753 1986-1997.
- 754 **Izhaki, A. and Bowman, J. L.** (2007). KANADI and class III HD-Zip gene families  
755 regulate embryo patterning and modulate auxin flow during embryogenesis in  
756 *Arabidopsis*. *Plant Cell* **19**, 495-508.
- 757 **Jonsson, H., Heisler, M. G., Shapiro, B. E., Meyerowitz, E. M. and Mjolsness, E.**  
758 (2006). An auxin-driven polarized transport model for phyllotaxis. *Proceedings of*  
759 *the National Academy of Sciences of the United States of America* **103**, 1633-  
760 1638.
- 761 **Karimi, M., Inze, D. and Depicker, A.** (2002). GATEWAY vectors for *Agrobacterium*-  
762 mediated plant transformation. *Trends Plant Sci* **7**, 193-195.
- 763 **Kerstetter, R. A., Bollman, K., Taylor, R. A., Bomblies, K. and Poethig, R. S.** (2001).  
764 KANADI regulates organ polarity in *Arabidopsis*. *Nature* **411**, 706-709.
- 765 **Kidner, C. A. and Martienssen, R. A.** (2004). Spatially restricted microRNA directs  
766 leaf polarity through ARGONAUTE1. *Nature* **428**, 81-84.



- 767 **Koenig, D., Bayer, E., Kang, J., Kuhlemeier, C. and Sinha, N.** (2009). Auxin patterns  
768 *Solanum lycopersicum* leaf morphogenesis. *Development* **136**, 2997-3006.
- 769 **Kuhlemeier, C. and Timmermans, M. C.** (2016). The Sussex signal: insights into leaf  
770 dorsiventrality. *Development* **143**, 3230-3237.
- 771 **Landrein, B., Kiss, A., Sassi, M., Chauvet, A., Das, P., Cortizo, M., Laufs, P.,**  
772 **Takeda, S., Aida, M., Traas, J., et al.** (2015). Mechanical stress contributes to  
773 the expression of the STM homeobox gene in Arabidopsis shoot meristems. *eLife*  
774 **4**, e07811.
- 775 **Liao, C. Y., Smet, W., Brunoud, G., Yoshida, S., Vernoux, T. and Weijers, D.** (2015).  
776 Reporters for sensitive and quantitative measurement of auxin response. *Nat*  
777 *Methods* **12**, 207-210, 202 p following 210.
- 778 **Matsumoto, N. and Okada, K.** (2001). A homeobox gene, PRESSED FLOWER,  
779 regulates lateral axis-dependent development of Arabidopsis flowers. *Genes Dev*  
780 **15**, 3355-3364.
- 781 **McConnell, J. R., Emery, J., Eshed, Y., Bao, N., Bowman, J. and Barton, M. K.**  
782 (2001). Role of PHABULOSA and PHAVOLUTA in determining radial  
783 patterning in shoots. *Nature* **411**, 709-713.
- 784 **Merelo, P., Ram, H., Pia Caggiano, M., Ohno, C., Ott, F., Straub, D., Graeff, M.,**  
785 **Cho, S. K., Yang, S. W., Wenkel, S., et al.** (2016). Regulation of MIR165/166  
786 by class II and class III homeodomain leucine zipper proteins establishes leaf  
787 polarity. *Proc Natl Acad Sci U S A*.
- 788 **Merelo, P., Xie, Y., Brand, L., Ott, F., Weigel, D., Bowman, J. L., Heisler, M. G. and**  
789 **Wenkel, S.** (2013). Genome-wide identification of KANADI1 target genes. *PLoS*  
790 *One* **8**, e77341.
- 791 **Miyashima, S., Honda, M., Hashimoto, K., Tatematsu, K., Hashimoto, T., Sato-**  
792 **Nara, K., Okada, K. and Nakajima, K.** (2013). A comprehensive expression  
793 analysis of the Arabidopsis MICRORNA165/6 gene family during embryogenesis  
794 reveals a conserved role in meristem specification and a non-cell-autonomous  
795 function. *Plant Cell Physiol* **54**, 375-384.
- 796 **Miyashima, S., Koi, S., Hashimoto, T. and Nakajima, K.** (2011). Non-cell-  
797 autonomous microRNA165 acts in a dose-dependent manner to regulate multiple  
798 differentiation status in the Arabidopsis root. *Development* **138**, 2303-2313.
- 799 **Nagai, T., Ibata, K., Park, E. S., Kubota, M., Mikoshiba, K. and Miyawaki, A.**  
800 (2002). A variant of yellow fluorescent protein with fast and efficient maturation  
801 for cell-biological applications. *Nature Biotechnology* **20**, 87-90.
- 802 **Nakata, M., Matsumoto, N., Tsugeki, R., Rikirsch, E., Laux, T. and Okada, K.**  
803 (2012). Roles of the middle domain-specific WUSCHEL-RELATED  
804 HOMEODOMAIN genes in early development of leaves in Arabidopsis. *Plant Cell* **24**,  
805 519-535.
- 806 **Nguyen, A. W. and Daugherty, P. S.** (2005). Evolutionary optimization of fluorescent  
807 proteins for intracellular FRET. *Nat Biotechnol* **23**, 355-360.
- 808 **Nishimura, T., Hayashi, K., Suzuki, H., Gyohda, A., Takaoka, C., Sakaguchi, Y.,**  
809 **Matsumoto, S., Kasahara, H., Sakai, T., Kato, J., et al.** (2014). Yucasin is a  
810 potent inhibitor of YUCCA, a key enzyme in auxin biosynthesis. *Plant J* **77**, 352-  
811 366.

- 812 **Nogueira, F. T. S., Madi, S., Chitwood, D. H., Juarez, M. T. and Timmermans, M.**  
813 **C. P.** (2007). Two small regulatory RNAs establish opposing fates of a  
814 developmental axis. *Genes & Development* **21**, 750-755.
- 815 **Otsuga, D., DeGuzman, B., Prigge, M. J., Drews, G. N. and Clark, S. E.** (2001).  
816 REVOLUTA regulates meristem initiation at lateral positions. *Plant J* **25**, 223-  
817 236.
- 818 **Qi, J., Wang, Y., Yu, T., Cunha, A., Wu, B., Vernoux, T., Meyerowitz, E. and Jiao,**  
819 **Y.** (2014). Auxin depletion from leaf primordia contributes to organ patterning.  
820 *Proc Natl Acad Sci U S A* **111**, 18769-18774.
- 821 **Reinhardt, D., Frenz, M., Mandel, T. and Kuhlemeier, C.** (2005). Microsurgical and  
822 laser ablation analysis of leaf positioning and dorsoventral patterning in tomato.  
823 *Development* **132**, 15-26.
- 824 **Reinhardt, D., Mandel, T. and Kuhlemeier, C.** (2000). Auxin regulates the initiation  
825 and radial position of plant lateral organs. *Plant Cell* **12**, 507-518.
- 826 **Reinhardt, D., Pesce, E. R., Stieger, P., Mandel, T., Baltensperger, K., Bennett, M.,**  
827 **Traas, J., Friml, J. and Kuhlemeier, C.** (2003). Regulation of phyllotaxis by  
828 polar auxin transport. *Nature* **426**, 255-260.
- 829 **Roslan, H. A., Salter, M. G., Wood, C. D., White, M. R., Croft, K. P., Robson, F.,**  
830 **Coupland, G., Doonan, J., Laufs, P., Tomsett, A. B., et al.** (2001).  
831 Characterization of the ethanol-inducible alc gene-expression system in  
832 *Arabidopsis thaliana*. *Plant J* **28**, 225-235.
- 833 **Rosso, M. G., Li, Y., Strizhov, N., Reiss, B., Dekker, K. and Weisshaar, B.** (2003). An  
834 *Arabidopsis thaliana* T-DNA mutagenized population (GABI-Kat) for flanking  
835 sequence tag-based reverse genetics. *Plant Mol Biol* **53**, 247-259.
- 836 **Sahlin, P. and Jonsson, H.** (2010). A modeling study on how cell division affects  
837 properties of epithelial tissues under isotropic growth. *PLoS One* **5**, e11750.
- 838 **Sahlin, P., Soderberg, B. and Jonsson, H.** (2009). Regulated transport as a mechanism  
839 for pattern generation: capabilities for phyllotaxis and beyond. *J Theor Biol* **258**,  
840 60-70.
- 841 **Samalova, M., Brzobohaty, B. and Moore, I.** (2005). pOp6/LhGR: a stringently  
842 regulated and highly responsive dexamethasone-inducible gene expression system  
843 for tobacco. *Plant J.* **41**, 919-935.
- 844 **Sessions, A., Weigel, D. and Yanofsky, M. F.** (1999). The *Arabidopsis thaliana*  
845 MERISTEM LAYER 1 promoter specifies epidermal expression in meristems and  
846 young primordia. *Plant J* **20**, 259-263.
- 847 **Shaner, N. C., Campbell, R. E., Steinbach, P. A., Giepmans, B. N., Palmer, A. E. and**  
848 **Tsien, R. Y.** (2004). Improved monomeric red, orange and yellow fluorescent  
849 proteins derived from *Discosoma* sp. red fluorescent protein. *Nat Biotechnol* **22**,  
850 1567-1572.
- 851 **Shimizu, R., Ji, J., Kelsey, E., Ohtsu, K., Schnable, P. S. and Scanlon, M. J.** (2009).  
852 Tissue specificity and evolution of meristematic *WOX3* function. *Plant Physiol.*  
853 **149**, 841-850.
- 854 **Smith, R. S., Guyomarc'h, S., Mandel, T., Reinhardt, D., Kuhlemeier, C. and**  
855 **Prusinkiewicz, P.** (2006). A plausible model of phyllotaxis. *Proc Natl Acad Sci*  
856 *U S A* **103**, 1301-1306.

- 857 **Smith, Z. R. and Long, J. A.** (2010). Control of Arabidopsis apical-basal embryo  
858 polarity by antagonistic transcription factors. *Nature* **464**, 423-426.
- 859 **Snow, C. P.** (1959). *The two cultures and the scientific revolution*. New York, :  
860 Cambridge University Press.
- 861 **Snow, M. and Snow, R.** (1959). The dorsiventrality of leaf primordia. *New Phytol* **58**,  
862 19.
- 863 **Sussex, I. M.** (1951). Experiments on the cause of dorsiventrality in leaves. *Nature* **167**,  
864 651-652.
- 865 **Sussex, I. M.** (1955). Morphogenesis in *Solanum tuberosum* I: experimental  
866 investigation of leaf dorsiventrality and orientation in the juvenile shoot.  
867 *Phytomorphology* **5**, 286-300.
- 868 **Tameshige, T., Fujita, H., Watanabe, K., Toyokura, K., Kondo, M., Tatematsu, K.,**  
869 **Matsumoto, N., Tsugeki, R., Kawaguchi, M., Nishimura, M., et al.** (2013).  
870 Pattern dynamics in adaxial-abaxial specific gene expression are modulated by a  
871 plastid retrograde signal during *Arabidopsis thaliana* leaf development. *PLoS*  
872 *Genet* **9**, e1003655.
- 873 **Waites, R. and Hudson, A.** (1995). Phantastica - a Gene Required for Dorsoventrality of  
874 Leaves in *Antirrhinum-Majus*. *Development* **121**, 2143-2154.
- 875 **William H. Press, S. A. T., William T. Vetterling, Brian P. Flannery** (2007).  
876 *Numerical Recipes: The art of scientific computing* (3rd edn). New York, NY,  
877 USA: Cambridge University Press
- 878 **Yadav, R. K., Perales, M., Gruel, J., Ohno, C., Heisler, M., Girke, T., Joensson, H.**  
879 **and Reddy, G. V.** (2013). Plant stem cell maintenance involves direct  
880 transcriptional repression of differentiation program. *Molecular Systems Biology*  
881 **9**.
- 882 **Yan, J., Gu, Y., Jia, X., Kang, W., Pan, S., Tang, X., Chen, X. and Tang, G.** (2012).  
883 Effective small RNA destruction by the expression of a short tandem target mimic  
884 in *Arabidopsis*. *Plant Cell* **24**, 415-427.
- 885 **Yao, X., Wang, H., Li, H., Yuan, Z., Li, F., Yang, L. and Huang, H.** (2009). Two  
886 types of cis-acting elements control the abaxial epidermis-specific transcription of  
887 the MIR165a and MIR166a genes. *FEBS Lett* **583**, 3711-3717.
- 888 **Zhang, F., Wang, Y., Li, G., Tang, Y., Kramer, E. M. and Tadege, M.** (2014).  
889 STENOFOLIA recruits TOPLESS to repress ASYMMETRIC LEAVES2 at the  
890 leaf margin and promote leaf blade outgrowth in *Medicago truncatula*. *Plant Cell*  
891 **26**, 650-664.
- 892 **Zhang, Z., Tucker, E., Hermann, M. and Laux, T.** (2017). A Molecular Framework  
893 for the Embryonic Initiation of Shoot Meristem Stem Cells. *Dev Cell* **40**, 264-277  
894 e264.
- 895 **Zuo, J., Niu, Q. W., Moller, S. G. and Chua, N. H.** (2001). Chemical-regulated, site-  
896 specific DNA excision in transgenic plants. *Nat Biotechnol* **19**, 157-161.
- 897

898  
899  
900

901



902

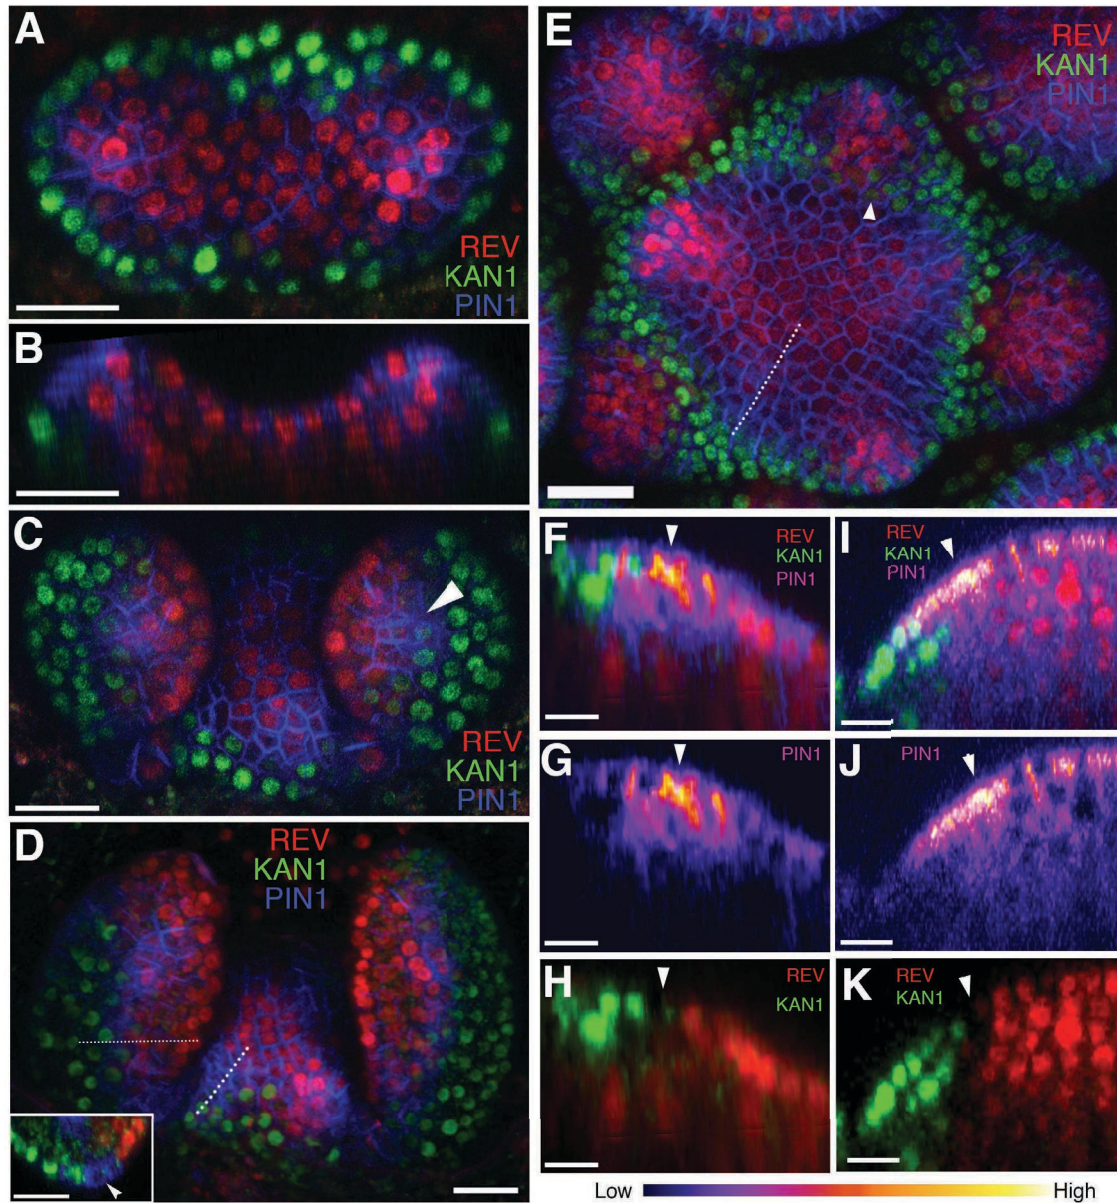

903

904

905

906 **Figure 1.**

907 **Organ initiation is centered on a boundary between the expression domains of genes**  
908 **involved in leaf dorsoventrality.**

909 (A to D) Confocal projections showing REV-2×YPet (red), PIN1-CFP (blue) and KAN1-  
910 2×GFP (green) expression in a vegetative shoot apical meristem at 3 days (A), 4 days (C)  
911 and 5 days (D) after stratification (DAS), respectively. Inset in (D) shows a transverse

912 optical section across the dotted line in the left leaf. White arrowhead in the inset marks  
913 the cells in between the REV-2×YPet and KAN1-2×GFP expression domains where  
914 PIN1-CFP expression is highest. **(B)** Longitudinal reconstructed section of seedling  
915 shown in (A). **(E)** Expression pattern of REV-2×YPet, KAN1-2×GFP and PIN1-CFP in  
916 an inflorescence meristem. White arrow head marks region where KAN1-2×GFP  
917 expression is being reestablished after organ emergence. **(F to K)** Longitudinal optical  
918 sections across the dashed lines in (D) and (E) showing localized PIN1-CFP expression  
919 (magenta) marking organ inception at the REV-2×YPet /KAN1-2×GFP boundary in both  
920 the vegetative meristem (F-H) and inflorescence meristem (I-K). White arrow heads mark  
921 cells in between the REV-2×YPet and KAN1-2×GFP expression domains where PIN1-  
922 CFP expression is highest. Scale bars, 20  $\mu\text{m}$  (A-E, inset in (D)) and 10  $\mu\text{m}$  (F-K).

923

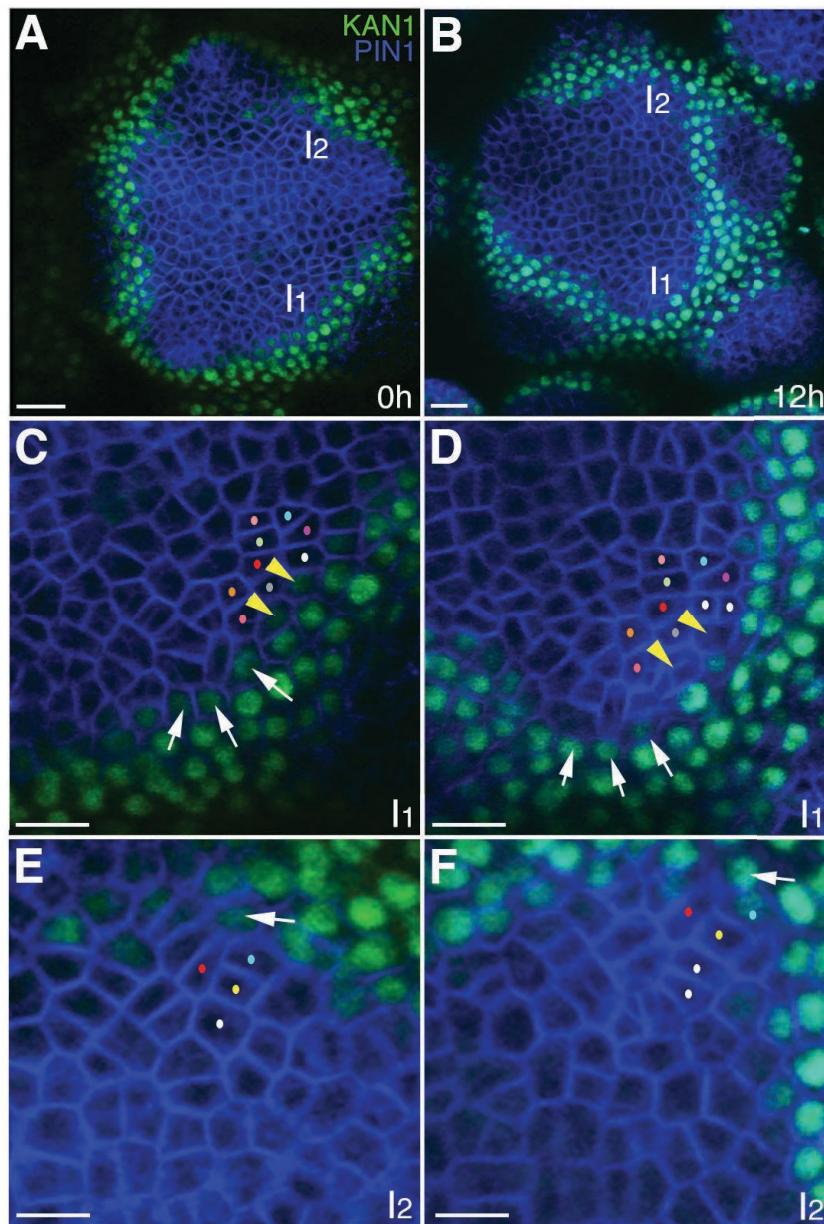

924

925

926

927

928

929

930

931

932

**Figure 2.**

**The expression of KAN1-2xGFP is relatively stable with respect to the underlying cells within initiating organs.**

(A-B) Confocal projections showing an inflorescence meristem viewed from above expressing PIN1-CFP (blue) and KAN1-2xGFP (green) at two time points (0h and 12h).

Two incipient primordia are marked I1 and I2. (C-D) Close up views corresponding to primordium I1 from (A) and (B) with white arrows marking three cells at the edge of KAN1-2xGFP expression that retain this expression over the time interval. Yellow arrow



933 heads mark two cells in which KAN1-2×GFP is absent at 12h. Similar colored dots mark  
934 the same cells in (C) and (D), tracked over 12 hours. **(E)** Close up view of primordium I2  
935 in (A) with arrow marking adaxial edge of KAN1 expression. **(F)** Close up of  
936 primordium I2 in (B) showing the same cell marked in (E) remaining at the adaxial edge  
937 of KAN1 expression after 12 hours. Similar colored dots mark the same cells in (E) and  
938 (F), tracked over 12 hours. Scale bars, 20 μm in (A and B); 10 μm in (C-F).

939

940

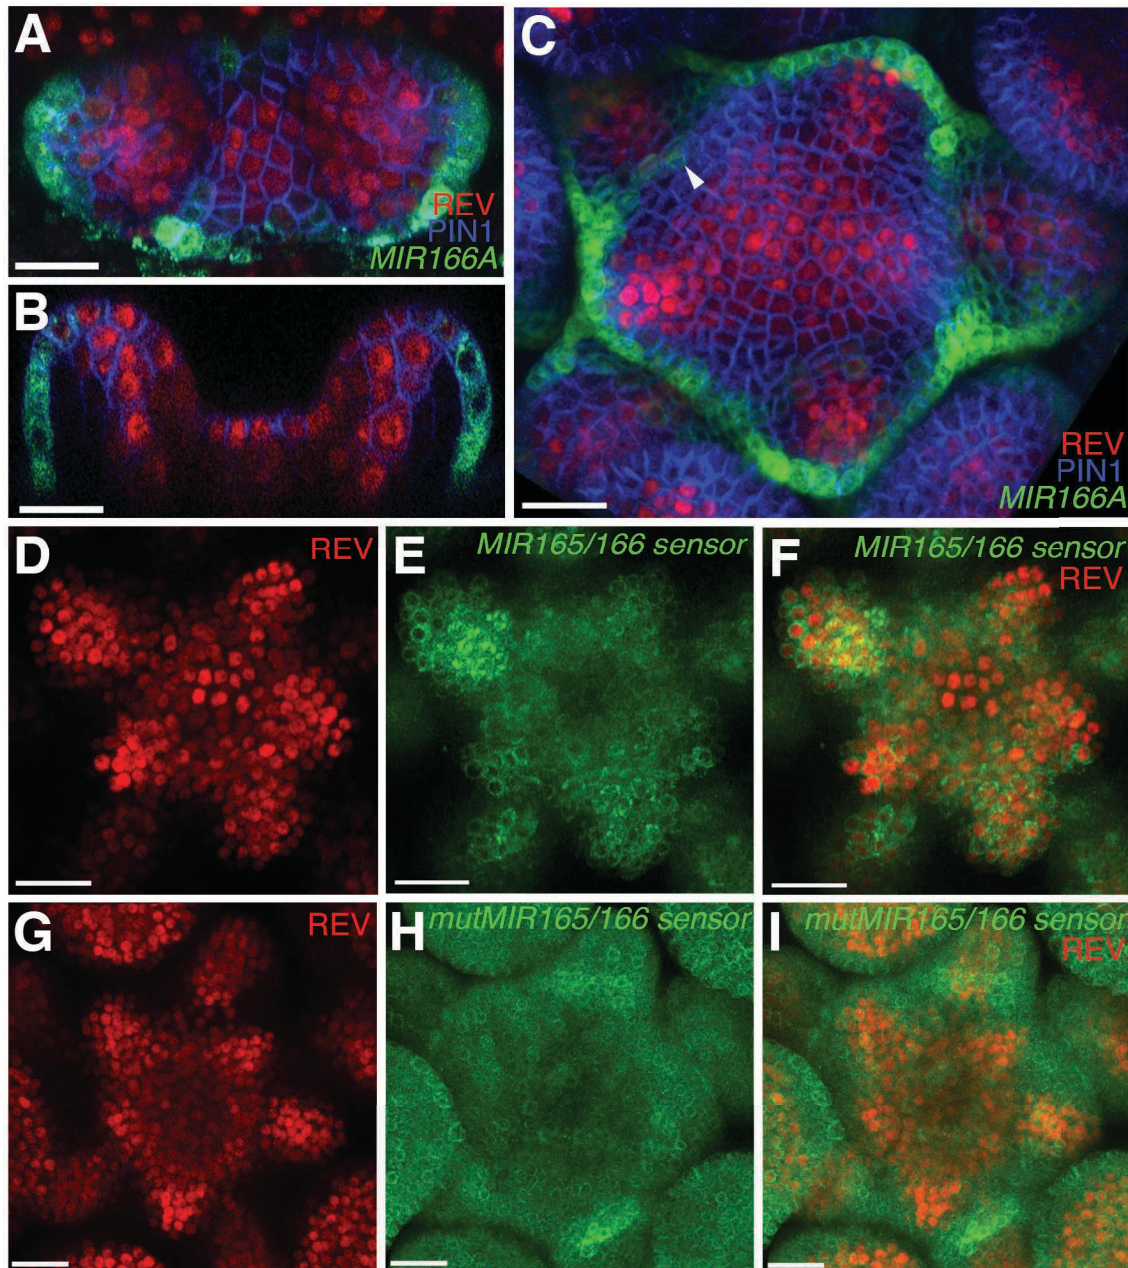

941

942 **Figure 3.**

943 **Expression and activity of MIR165/166 is localized to the periphery of the shoot**  
944 **meristem.**

945 (A) Expression of *MIR166Ap::GFPER* (green), PIN1-CFP (blue) and REV-2×YPet (red)

946 in the vegetative meristem (VM) at 3.5 DAS. (B) Longitudinal section of meristem

947 shown in (A). (C) Expression of *MIR166Ap::GFPER* (green), PIN1-CFP (blue) and

948 REV-2×YPet (red) in the inflorescence meristem (IM). White arrow head marks the  
949 reestablishment of *MIR166Ap::GFPER* expression around the meristem after organ  
950 emergence. **(D to F)** Expression of REV-2×YPet (red) alone (D), a MIR165/166  
951 biosensor driven by the *UBQ10* promoter (green) alone (E) and both combined in the  
952 same IM (F). **(G to I)** Corresponding control for (D to F) where the MIR165/166  
953 biosensor has been rendered insensitive to MIRNA activity. Bars represent 20  $\mu$ m.  
954

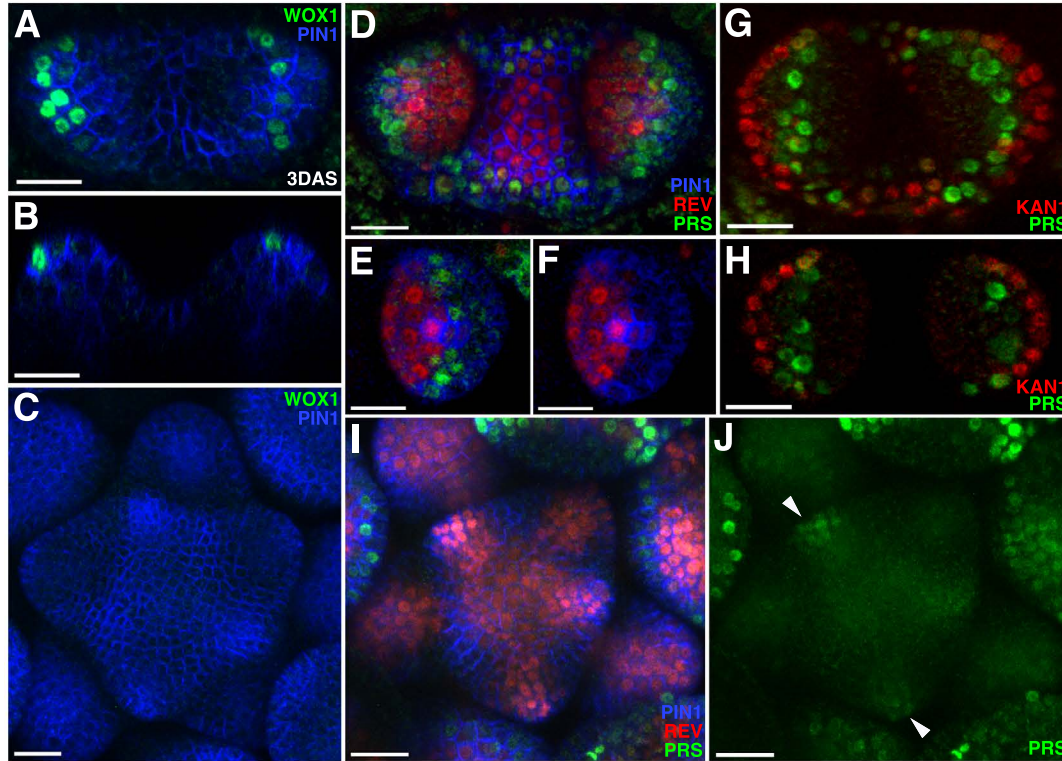

955

956 **Figure 4.**

957 **Expression patterns of 2×GFP-WOX1 and PRS-2×GFP**

958 Confocal projections showing PIN1-CFP (blue) and 2×GFP-WOX1 (green) expression  
959 patterns in the vegetative meristem and leaves of seedlings at 3 DAS. (B) Longitudinal  
960 section of meristem shown in (A). (C) An inflorescence meristem image showing  
961 2×GFP-WOX1 is not expressed in the IM. (D) Confocal projection showing PIN1-CFP  
962 (blue), PRS-2×GFP (green) and REV-2×YPet (red) expression in the vegetative meristem  
963 and leaves at 3.5 DAS, where PRS-2×GFP is expressed surrounding the VM and along  
964 the leaf margins. (E and F) Cross sections of leaf on the right side in (D) showing the  
965 expression of PRS-2×GFP in the middle domain of the leaf. (G and H) Confocal  
966 projection and cross section showing PRS-2×GFP (green) and KAN1-2×CFP (red)  
967 expression patterns in the vegetative meristem and leaves of seedlings at 3 DAS. (I and  
968 J) PRS-2×GFP (green) is expressed in the young floral bracts in the IM, indicated with  
969 arrowhead in (J). Bar = 20 μm.

970



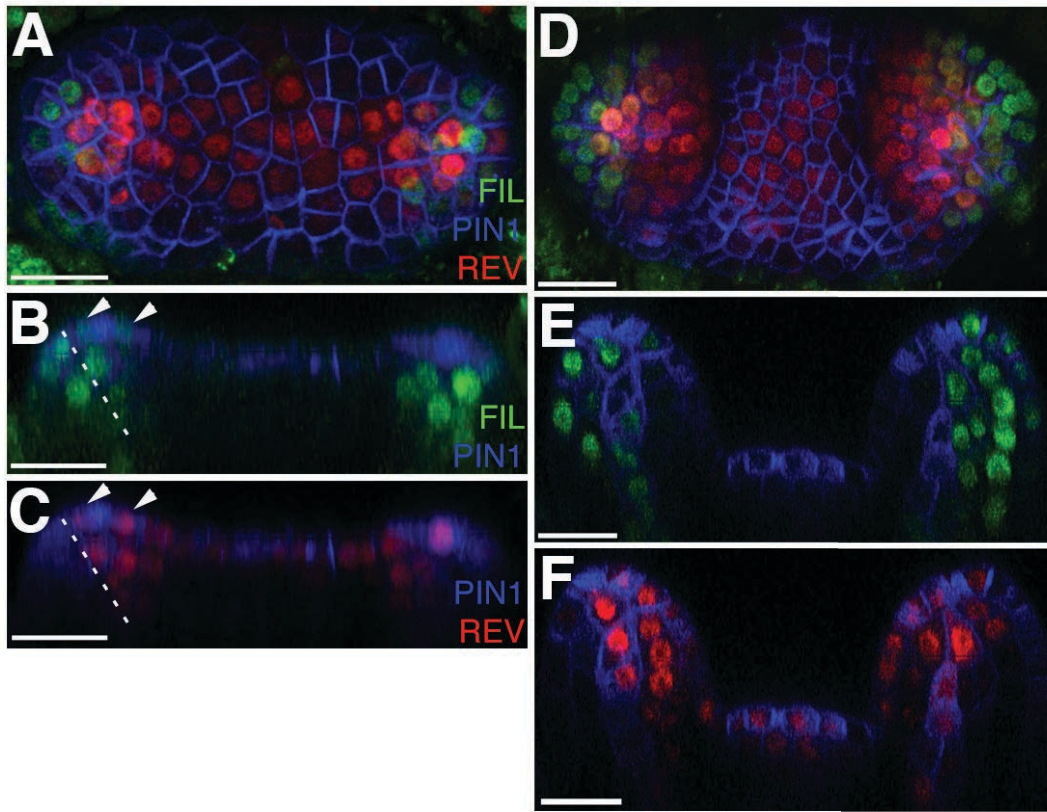

971

972 **Figure 5**

973 ***FILp::dsREDN7* expression is broad during leaf initiation but is later excluded from**  
974 **dorsal tissues. (A-F)** Confocal projections and reconstructed sections of seedlings  
975 expressing *FILp::dsREDN7* (green), REV-2×VENUS (red) and PIN1-CFP (blue). (A)  
976 Top view of seedling at 3DAS (B to C) Longitudinal section of seedling shown in (A).  
977 Dashed line shows dorsoventral axis of first leaf and arrowheads mark dorsal cells  
978 expressing both REV-2×VENUS and *FILp::dsREDN7*. (D) Seedlings at 3.5 DAS with  
979 *FILp::dsREDN7* expression more restricted to the developing ventral side of the leaf. (E  
980 to F) Longitudinal sections of seedling shown in (D) showing a more complementary  
981 pattern of *FILp::dsREDN7* relative to REV-2×VENUS compared to the earlier stage  
982 shown in (A) to (C). Scale bars represent 20 μm.

983

984

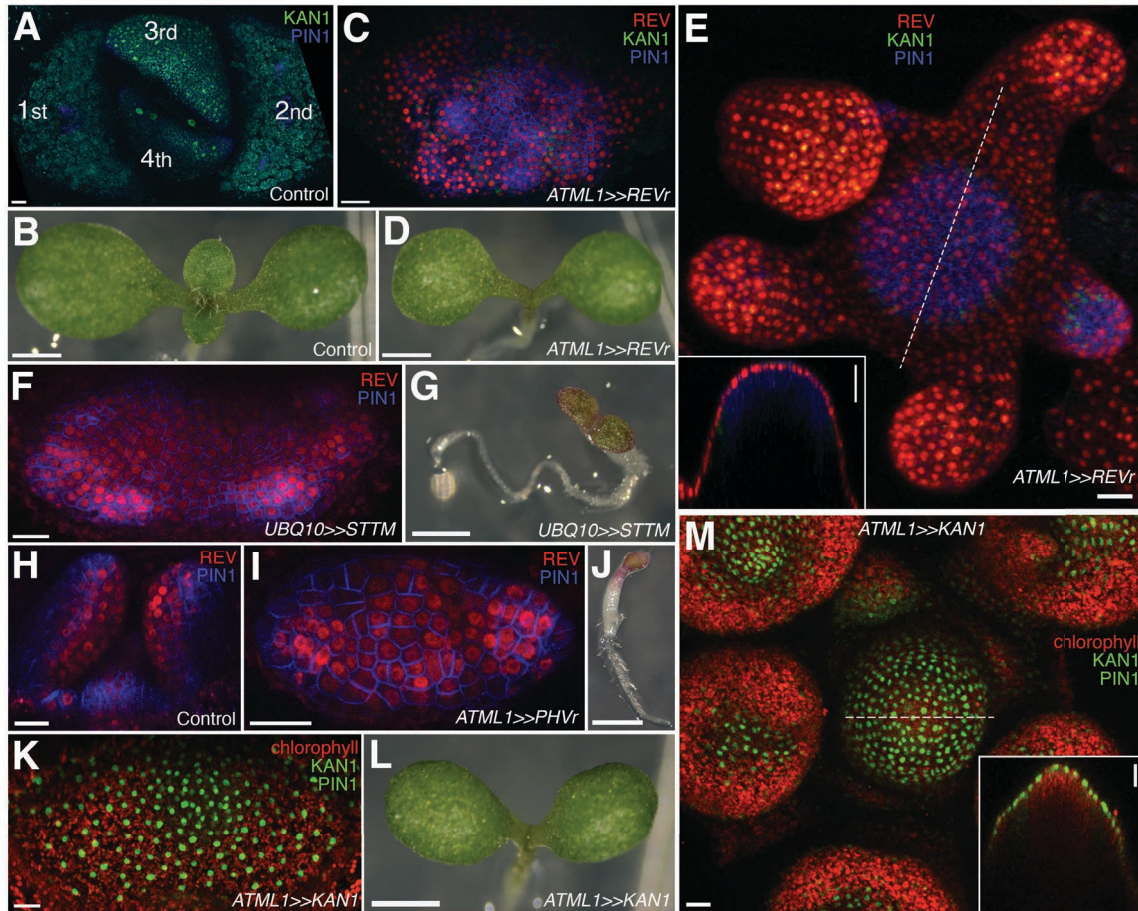

985

986 **Figure 6.**

987 **Organ initiation depends on the restriction of Class III HD-ZIP and KANADI**  
988 **expression in the shoot.**

989 (A) Confocal projection showing wild type control seedling at 7DAS viewed from above  
990 for comparison to (C) and (F). (B) Macroscopic view of control seedling at 7DAS for  
991 comparison to (D), (G) and (L). (C) Arrest of organogenesis after ectopic expression of  
992 REVr-2×VENUS from the *ATML1* promoter in the vegetative meristem (7 DAS) after  
993 germination on DEX, KAN1-2×GFP (green) expression is down regulated and could only  
994 be detected in a few cells in the sub-epidermis. Although PIN1-CFP (blue) expression is  
995 patchy, no leaves developed. (D) Macroscopic view of plant in (C). (E) Arrest of  
996 organogenesis after ectopic expression of REVr-2×VENUS (red) from the *ATML1* in the  
997 IM after 3 DEX treatments over 6 days. Note the absence of KAN1-2×GFP signal. Inset  
998 shows longitudinal optical section of the meristem across the dashed line. (F) Seedlings  
999 at 7DAS showing similar phenotype to (C) after induction of a short tandem target mimic

1000 (STTM) designed to down regulate MIR165/166 activity. **(G)** Macroscopic view of plant  
1001 in (F). **(H to J)** Ectopic expression of REV-2YPet (red) and arrest of organogenesis  
1002 (PIN1-CFP in blue) in 4DAS seedling after induction of MIR165/166 resistant  
1003 PHAVOLUTA. (H) Longitudinal view of un-induced control. Top view (I), and  
1004 macroscopic view (J) of induced seedling showing arrest of organ development. **(K and**  
1005 **L)** Confocal projection (K) and macroscopic view (L) of seedling at 7DAS after  
1006 induction of KAN1-GFP (green) in the epidermis. No leaves have developed  
1007 (autofluorescence shown in red). **(M)** Arrest of organogenesis after induction of KAN1-  
1008 GFP (green) driven by the *ATML1* promoter in the IM after 3 DEX treatments over 6  
1009 days; autofluorescence (red). Inset shows longitudinal optical section of the meristem  
1010 across the dashed line. Scale bars represent 20  $\mu\text{m}$  in (A, C, E, F, H to I, K and M); 1mm  
1011 in (B, D, G, J and L).  
1012



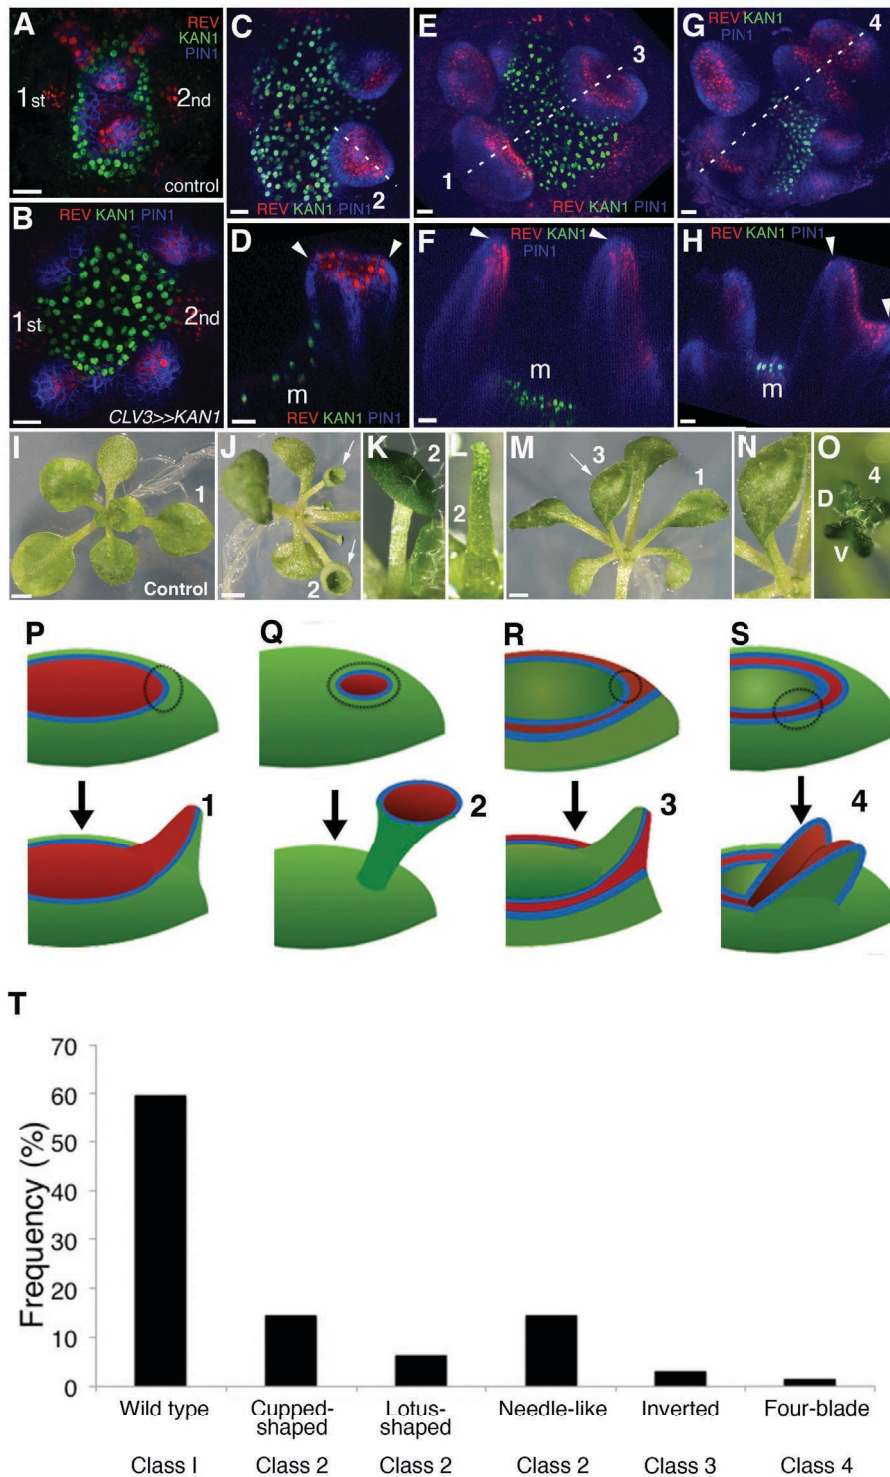

1013

1014 **Figure 7.**

1015 **KANADI1 expression boundaries in the shoot specify organ position and**  
1016 **orientation.**

1017 **(A and B)** Confocal projections showing organ initiation marked by REV-2×YPet (red)  
1018 and PIN1-CFP (blue) at border of KAN1-2×GFP expression (green) in wild type (A) and  
1019 after induction of KAN1-2×GFP using the *CLV3* promoter (B). Distance separating  
1020 opposite organs was greater for induced (B) compared to control (A) ( $114.3 \pm 3.3 \mu\text{m}$ ,  
1021  $n=19$  vs  $54.2 \pm 1.0 \mu\text{m}$   $n=10$  (mean $\pm$ SE,  $p<0.05$ , t-test)). **(C to H)** Confocal projections (C,  
1022 E and G) and longitudinal reconstructions corresponding to dashed lines (D, F and H  
1023 respectively) showing restricted REV-2×YPet expression (red) after ectopic KAN1-  
1024 2×GFP induction (green). Regions in which neither REV-2×YPet nor KAN1-2×GFP  
1025 signal was detected may potentially express endogenous KAN1, which was not  
1026 monitored. Four main configurations of REV expression and morphology were observed  
1027 (labeled 1 to 4). Class 1 organs (E and F) correspond to the wild type, Class 2 (C and D)  
1028 express REV-2×YPet centrally, Class 3 (E and F) express REV-2×YPet in a reversed  
1029 orientation and Class 4 (G and H) express REV-2×YPet centrally and laterally only.  
1030 Correspondence between REV-2×YPet expression boundaries and leaf margins indicated  
1031 by arrowheads in D, F and H; m indicates meristem. Gamma value changed to highlight  
1032 PIN1-CFP expression (blue) in (C) to (H). **(I to O)** Examples of mature leaves  
1033 corresponding to Classes 1 to 4, including the WT (I), cup-shaped (J), lotus-shaped (a  
1034 variation of cup-shaped) (K), needle-like (a further decrease in extent of dorsal tissue  
1035 compare to cup-shaped) (L), inverted (M and N) and four bladed (O). “D and V”  
1036 represent “dorsal” and “ventral” respectively in (O). **(P to S)** Diagrams summarizing  
1037 proposed configurations of REV and KAN (green) gene expression in leaf founder cells  
1038 (dashed circles) (upper diagram) leading to the observed phenotypic classes of leaf shape  
1039 (numbered 1 to 4) (lower diagram) after induction of KAN1-2×GFP using the *CLV3*  
1040 promoter. (P) represents the wild type Class 1 configuration, (Q) represents Class 2, (R)  
1041 represents Class 3 and (S) represents Class 4. **(T)** Frequency of seedlings exhibiting  
1042 different leaf morphologies after ectopic induction of KAN1-2×GFP expression in the  
1043 *CLV3* domain Class of phenotype corresponds to those indicated in (I to O). Scale  
1044 bars =  $20\mu\text{m}$  in A to H; 1 mm in I, J and M.

1045

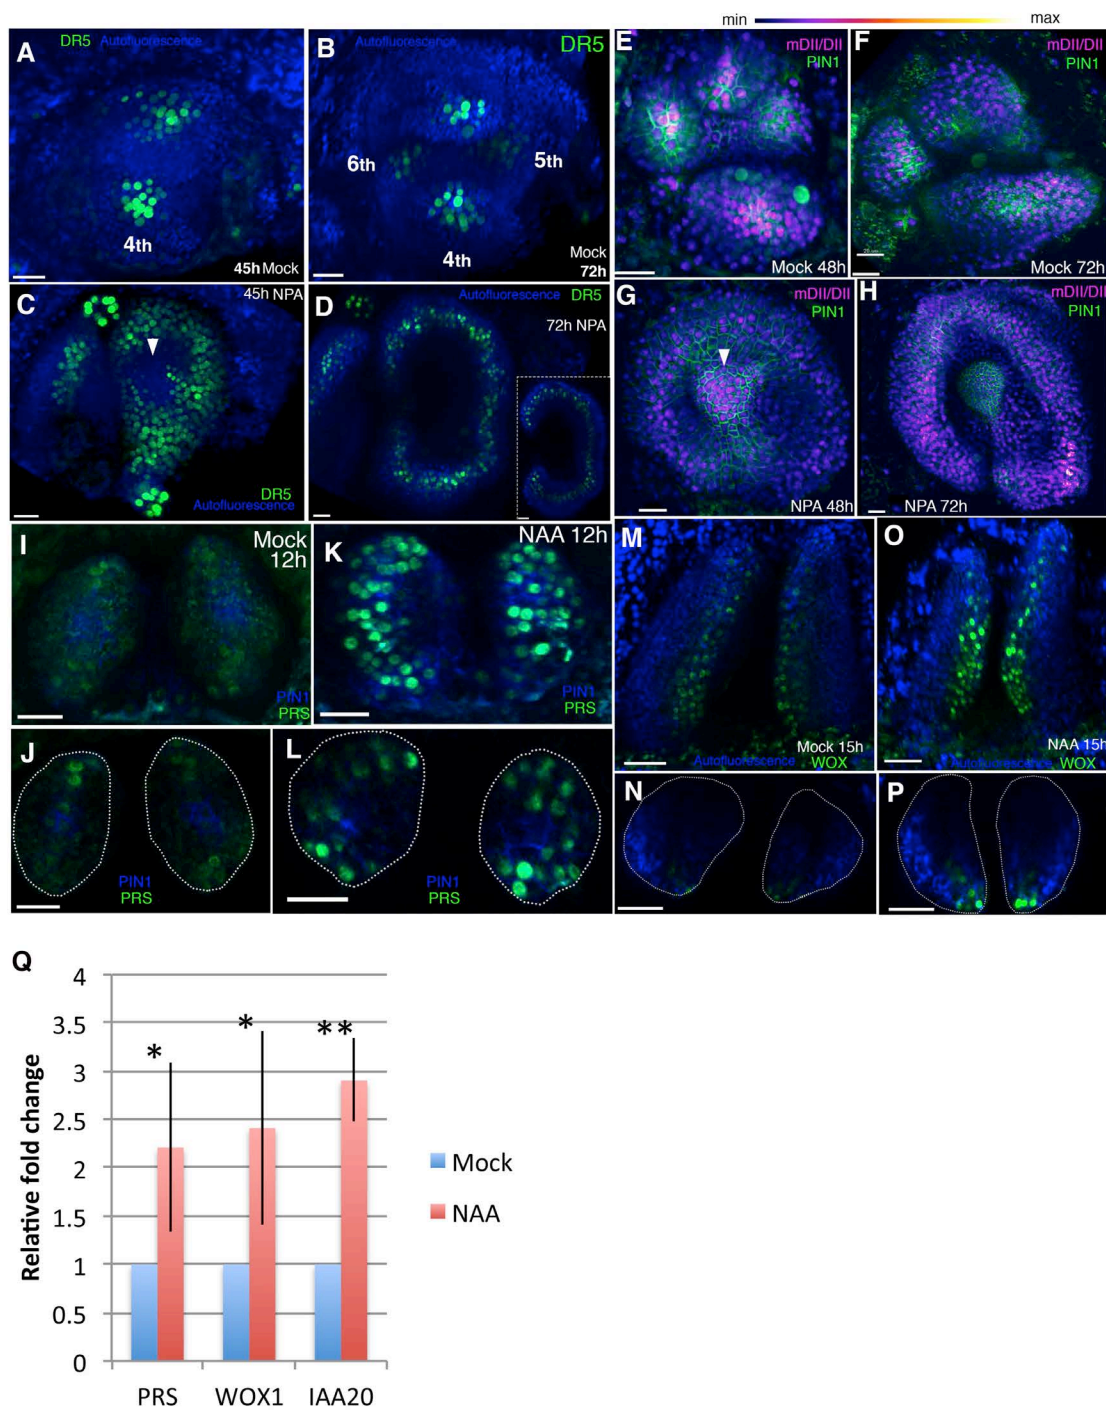

1046

1047 **Figure 8.**

1048 **Auxin promotes PRS and WOX expression.**

1049 (A-D) Response of pDR5V2-3×VENUS-N7 (green) auxin transcriptional reporter to

1050 NPA in Arabidopsis seedlings treated at 3DAS (Days after Stratification). (A and B)

1051 Confocal projections 45 hours (A) and 72 hours (B) after treatment with mock solution.  
1052 (C and D) Confocal projections 45 hours (C) and 72 hours (D) after treatment with  
1053 100 $\mu$ M NPA solution (n=5/5). Inset in (D) shows transverse optical section through the  
1054 ring-shaped organ showing most DR5 expression localized in the center of the organ. **(E-**  
1055 **H)** Expression and response of R2D2 (magenta) to auxin along with PIN1-GFP  
1056 expression (green) in Arabidopsis seedlings treated at 3DAS. (E and F) Confocal  
1057 projections 48 hours (E) and 72 hours (F) after treatment with mock solution. (G and H)  
1058 Confocal projections 48 hours (G) and 72 hours (H) after treatment with 100 $\mu$ M NPA  
1059 solution (n=4/4). **(I-L)** Expression and response of pPRS:: PRS-2 $\times$ GFP to auxin in  
1060 Arabidopsis seedlings. Confocal projections and transverse optical slices of seedlings  
1061 4DAS showing of pPRS:: PRS-2 $\times$ GFP expression (green) 12 hours after treatment with  
1062 mock solution (I and J) and 5mM NAA (K and L) (n=5/5). **(M-P)** Expression and  
1063 response of 2 $\times$ GFP-WOX to auxin in Arabidopsis seedlings. (M and N) Confocal  
1064 projections (M and O) and corresponding optical slices (N and P) of seedlings 4DAS  
1065 showing pWOX1::2 $\times$ GFP-WOX1 expression (green) 12 hours after treatment with mock  
1066 solution (M and N) and 5mM NAA (O and P). Note WOX expression increases but does  
1067 not expands beyond its regular expression domain upon auxin addition (n=5/5). **(Q)** Q-  
1068 PCR analysis of PRS, WOX1 and positive control IAA20 transcripts after 5mM NAA or  
1069 mock treatment on 4 days old wild-type (Ler) seedlings. \*= $p < 0.05$ , \*\*= $p < 0.001$ . Scale  
1070 bars 20 $\mu$ m (A-L, K); 15 $\mu$ m (J and L); 30 $\mu$ m (M-P).  
1071



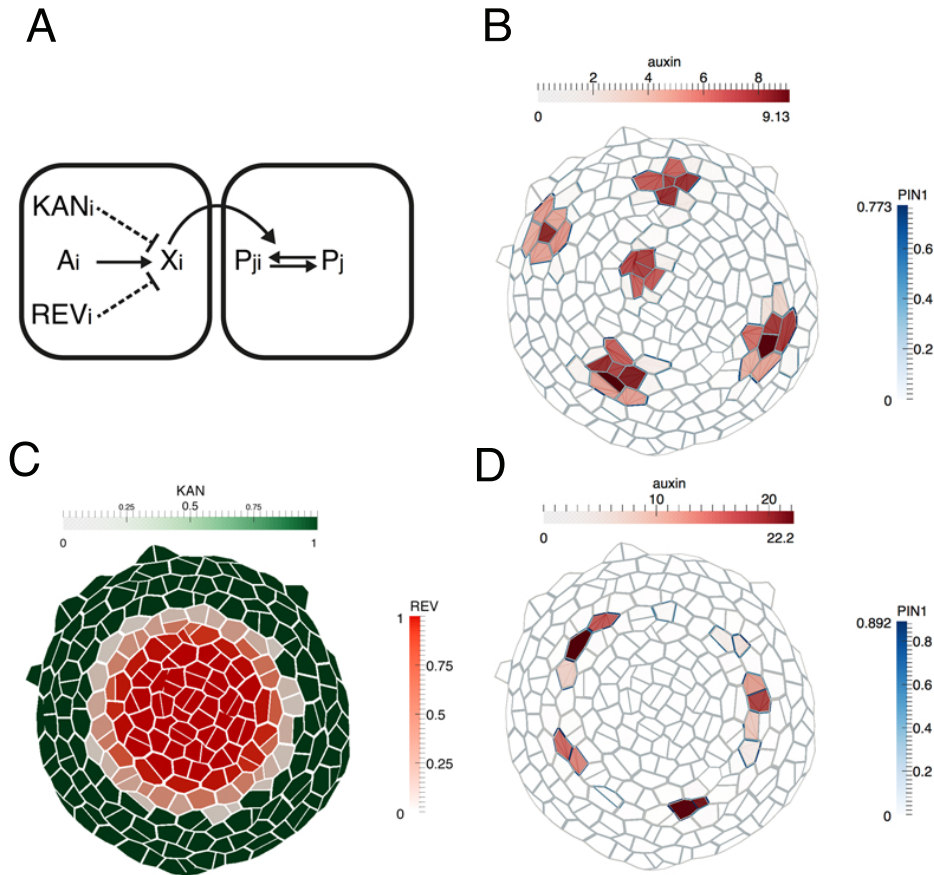

1072

1073

1074 **Figure 9.**

1075 **Computational model illustrating how dorsoventral gene expression boundaries**  
 1076 **may restrict phyllotactic patterning to the SAM peripheral zone.**

1077 (A) Illustration of model interactions. Auxin is transported passively and actively via  
 1078 PIN1 between cells. PIN1 is polarized towards cells with high auxin, via a signaling  
 1079 pathway represented by X (previously suggested to be realized by increased stresses in  
 1080 the neighboring cells due to changes in mechanical wall properties (Heisler et al., 2010).  
 1081 (B) As shown previously (Heisler et al., 2010; Jonsson et al., 2006; Smith et al., 2006),  
 1082 peaks of auxin are formed spontaneously. (C) A pattern of KANADI (green) and  
 1083 REVOLUTA (red) is added to the template with a boundary domain in between in which  
 1084 REV expression is low or absent and KAN1 expression is absent. (D) If KANADI and  
 1085 REVOLUTA decrease the signal X in cells where they are expressed (dashed interactions  
 1086 in A), the formation of auxin peaks is restricted to the boundary.

1087

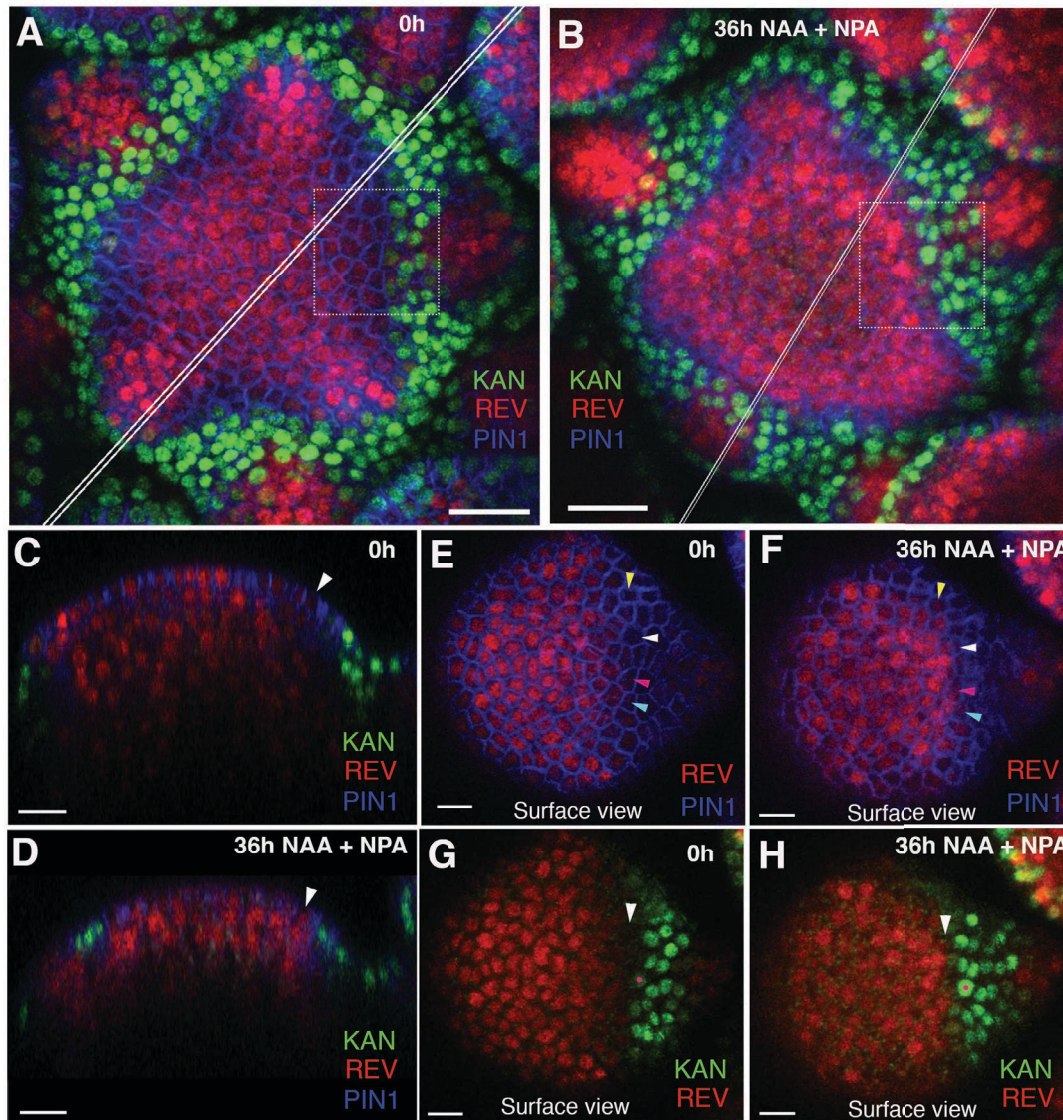

1088

1089

1090

1091

1092

1093

1094

1095

1096

1097

1098

1099

**Figure 10- Effect of auxin on the expression patterns of REV and KAN1 in the inflorescence meristem**

(A and B) Confocal projections of the IMs showing expression pattern of REV-2×YPet (red), KAN1-2×GFP (green) and PIN1-CFP (blue) before (A) and 36 hours after the combined application of 5mM NAA and 100μM NPA (B). Note REV expression has broadened slightly after the application of NAA and NPA combination (n=2/3). (C and D) Longitudinal optical sections along the white lines in (A) and (B) respectively. Note the presence of REV in the epidermal cell marked by a white arrowhead in (D) and its absence in (C). (E and F) Surface views of the regions outlined in dotted rectangles in (A) and (B) respectively, showing PIN1 expression in blue and REV expression in red

1100 before (E) and after NAA plus NPA treatment (F). Note the presence of REV expression  
1101 in the cells marked by colored arrowheads in (F) and its absence in the same cells prior to  
1102 NAA plus NPA application (E). (**G** and **H**) Same as (E and F) but showing REV  
1103 expression (red) along with KAN 1 expression (green). Note the presence of a gap (white  
1104 arrowhead) between REV and KAN1 expression in (G) but absence (white arrowhead) in  
1105 (H). Red dots in (G and H) mark the same cell tracked over 36 hours. Scale bars 20 $\mu$ m (A  
1106 and B) and 10 $\mu$ m (C-H).  
1107



1108

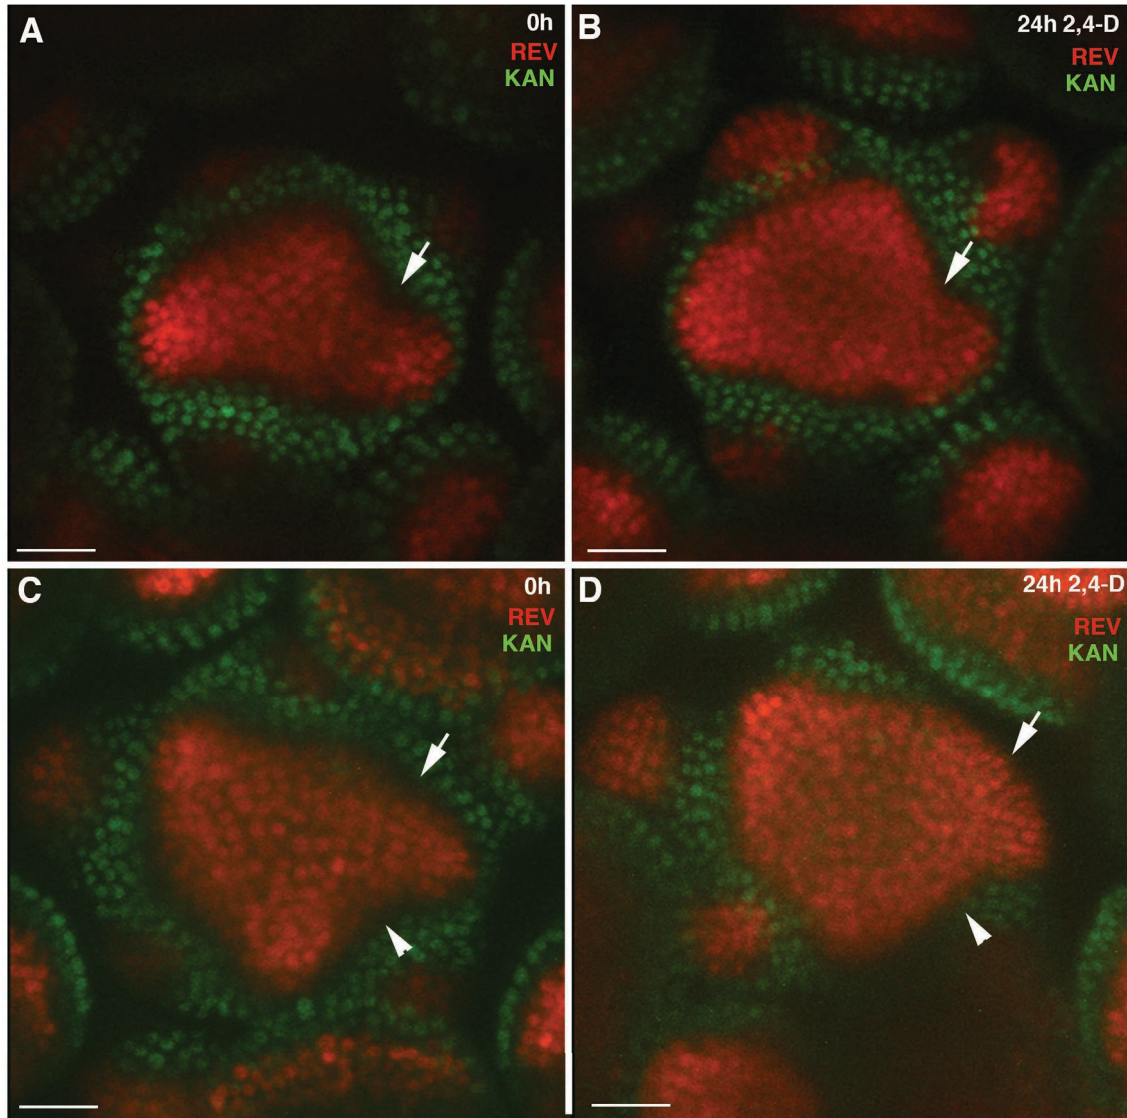

1109

1110 **Figure 10 -Figure Supplement 1**

1111 **Expression of REV in response to exogenous 2,4-D**

1112

1113 (A) REV-2xVENUS (red) and KAN1-2xGFP (green) expression in a wild type apex

1114 before 2,4-D treatment. Expression normally decreases in primordial boundary regions

1115 (arrow) (B) Inflorescence shown in (A) 24 hours after 2,4-D treatment. Expression in

1116 boundary region is maintained (arrow). (C) Another inflorescence expressing REV-

1117 2xVENUS and KAN1-2xGFP. Note cells in which both REV and KAN1 expression

1118 appears absent (arrows). (D) Same inflorescence as shown in (C) 24 hours after 2,4-D

1119 treatment showing REV expression now extending to the boundary of KAN1 expression

1120 (arrows). This REV expression is continuous between new primordial positions  
1121 indicating a lack of inter-organ down- regulation. Scale bars, 30 $\mu$ m (A-D)

1122

1123

1124

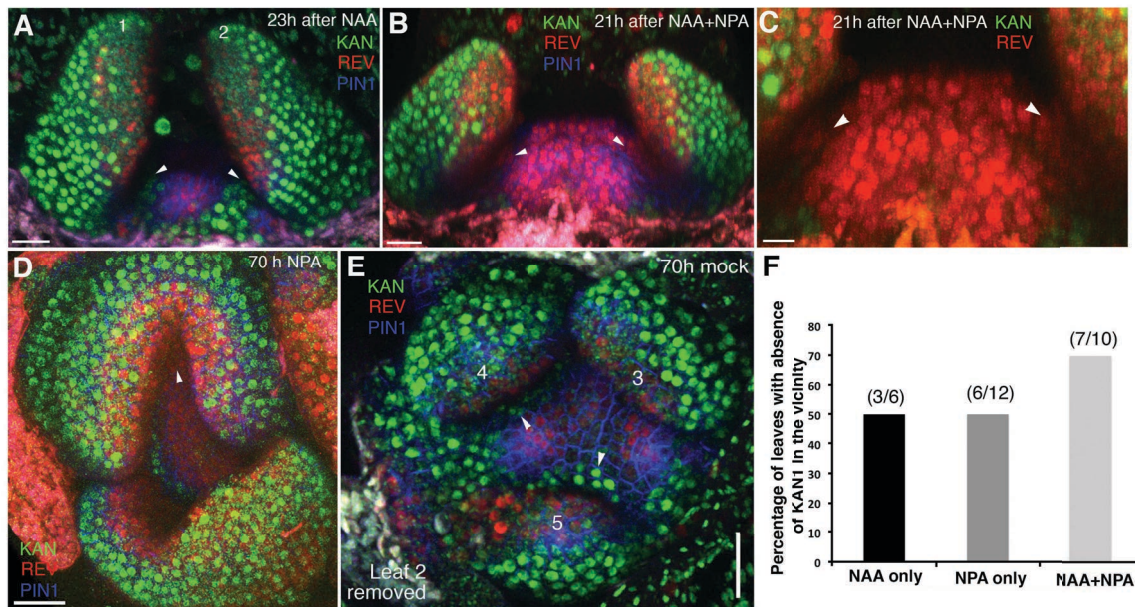

1125

1126 **Figure 11. High auxin levels prevent new KAN1 expression in the leaf axils.**

1127 (A-E) Confocal projection of the VM showing expression pattern of REV-2×YPet (red),  
1128 KAN1-2×GFP (green) and PIN1-CFP (blue) 23 hours after the treatment with 5mM NAA  
1129 (A), 21 hours after combined treatment with NAA and NPA (B and C); panel (C)  
1130 showing close-up view of the meristem in (B) with REV (red) and KAN1 (green)  
1131 expression only, 70 hours after treatment with NPA alone (D) and 70 hours after  
1132 treatment with mock (E). White arrowheads mark the presence of KAN1 expression in  
1133 the cells adjacent to the grown out leaves in (A) and (E) and absence in (B-D). Note that  
1134 REV expression (red) expanded towards leaves axils in (B-D). However also note that  
1135 REV expression appears faint in the leaf axils in (B and C) compared to (D). This is due  
1136 to the reason that the combined application of NAA and NPA resulted in the leaves  
1137 growing at an acute angle to the meristem, which caused shading and made it difficult  
1138 to reach leaf axils while imaging. (F) A bar graph showing percentages of leaves lacking  
1139 KAN1 expression in their vicinity upon treatment with NAA, NPA and NAA+NPA.  
1140 Scale bars 20µm (A and B), 10µm in (C) and 30µm (D and E).

1141

1142

1143

1144



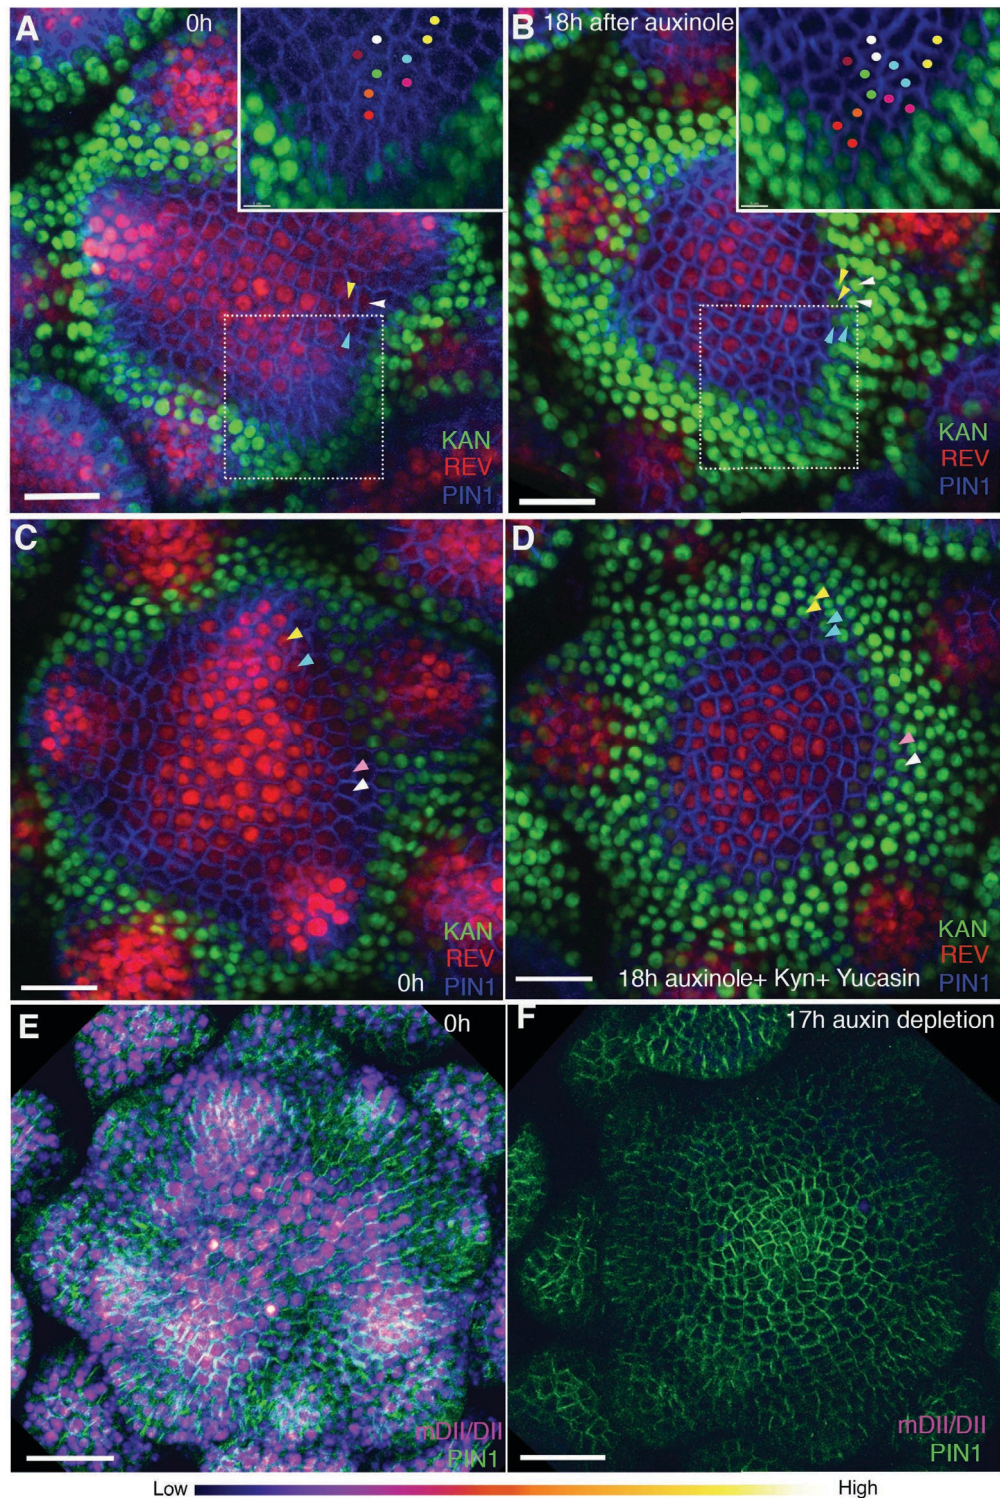

1145  
1146  
1147  
1148  
1149

**Figure 12 Auxin depletion alters boundary position**

(A and B) Confocal projections of the IMs showing expression pattern of REV-2xYPet (red), KAN1-2xGFP (green) and PIN1-CFP (blue) before (A) and 18 hours (B) after the application of 100μM auxinole. Inset shows close-up of the primordium outlined with the

1150 dotted rectangle. Similar colored dots mark the same cells at 0h and 18h time-points.  
1151 Note the presence of KAN1 expression in the proximity of the cells marked with colored  
1152 dots in the inset in (A) and its absence in the inset in (B). Similar color arrowheads in (A  
1153 and B) mark the same cells that showed REV expression at 0h but KAN1 expression at  
1154 18h after treatment with auxinole. **(C and D)** Confocal projections of the IMs showing  
1155 expression pattern of REV-2×YPet (red), KAN1-2×GFP (green) and PIN1-CFP (blue)  
1156 before (C) and 18 hours (D) after the combined application of 100μM auxinole, 100μM  
1157 KYN and 100μM Yucasin (auxin depleting drugs). Note KAN-2×GFP expression has  
1158 expanded centrally at the expense of REV-2×YPet expression (compare the cells marked  
1159 by arrowheads in (C) with (D), similar colored arrowheads mark the same cells tracked  
1160 over 18 hours) (n=6/6). **(E and F)** Confocal projections of the IMs indicating the  
1161 predicted auxin distribution (magenta) based on R2D2 expression along with PIN1-GFP  
1162 expression (green) before (E) and 17 hours after the combined application of 100μM  
1163 auxinole, 100μM kyn and 100μM yucasin (auxin depleting drugs) (F). Note lack of  
1164 detectable auxin based on R2D2 expression in (F) compared to (E) after the combined  
1165 drug application (n=3/4). Scale bars 20μm (A-D), 30μm (E and F).  
1166



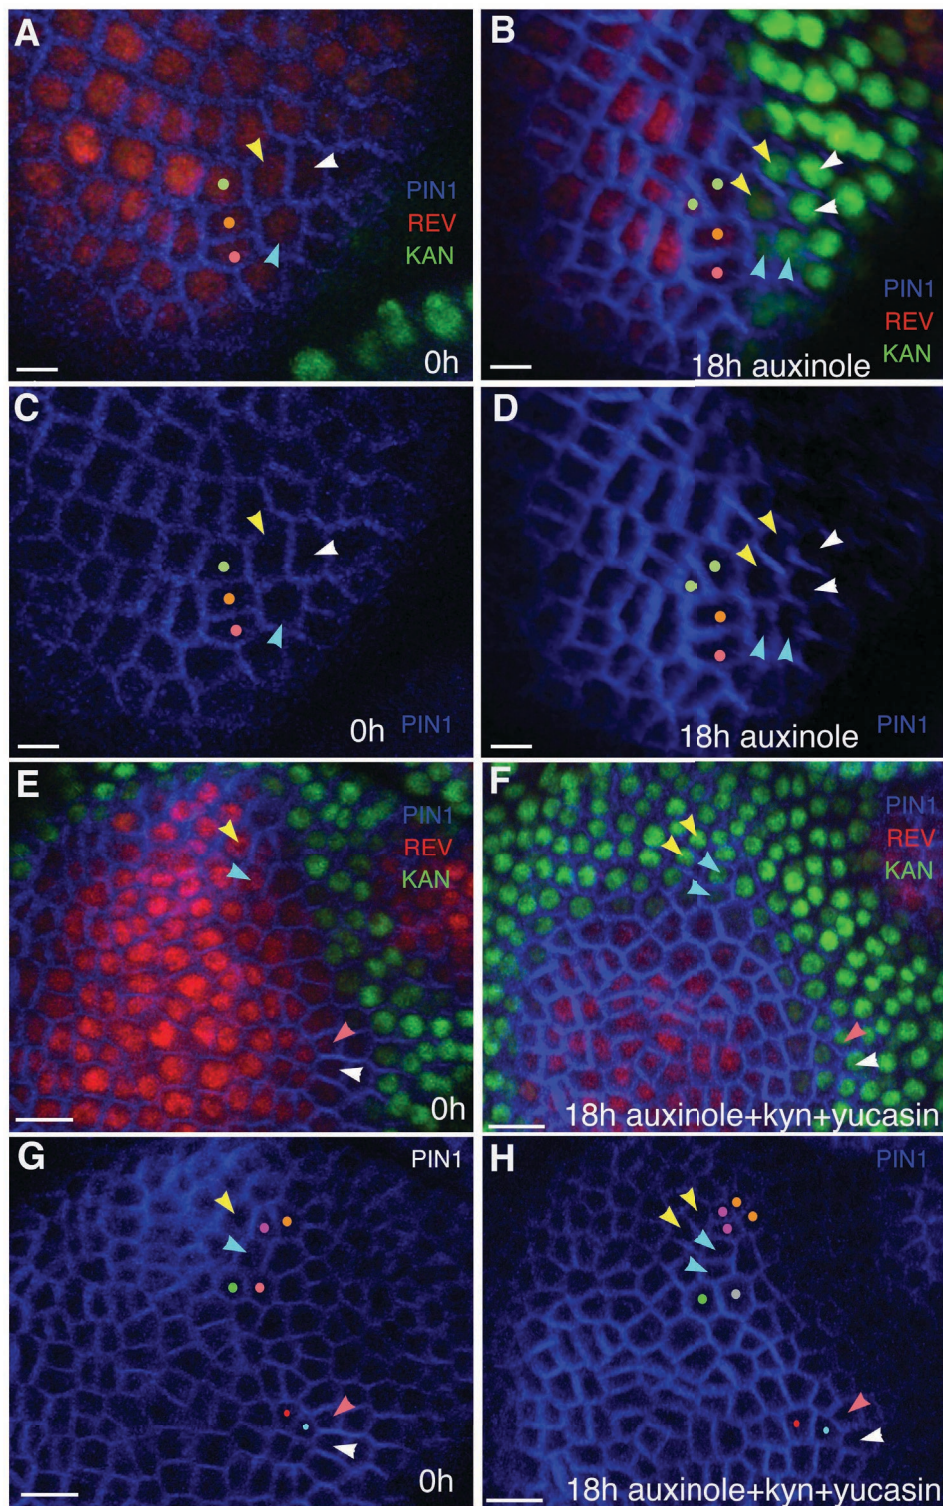

1167

1168 **Figure 12-Figure Supplement 1**

1169 **Auxin depletion results in KAN expression at the expense of REV**

1170 **(A and B)** Close-up views of cells marked with arrowheads in Figure 12A (A) and Figure  
1171 12B (B) showing PIN1 (blue), KAN (green) and REV expression (red). Similar colored  
1172 arrowheads mark the same cells tracked over 18 hours (same as in Figure 12 (A and B)).  
1173 **(C and D)** Same as (A and B) but showing PIN1 expression alone to clearly highlight cell  
1174 outlines for their identification after 18 hours of treatment with auxinole. **(E and F)**  
1175 Close-up views of the cells marked with arrowheads in Figure 12C (E) and Figure 12D  
1176 (F) showing PIN1 (blue), KAN (green) and REV expression (red). Similar colored  
1177 arrowheads mark the same cells tracked over 18 hours (same as in Figure 12 (C and D)).  
1178 **(G and H)** Same as (E and F) but showing PIN1 expression alone to clearly highlight cell  
1179 outlines for their identification, 18 hours after combined treatment with auxinole, yucasin  
1180 and kyn. Cells marked with same colored dots are tracked over 18 hours in (A-H). Scale  
1181 bars, 5 $\mu$ m (A-D) and 10  $\mu$ m (E-H).  
1182



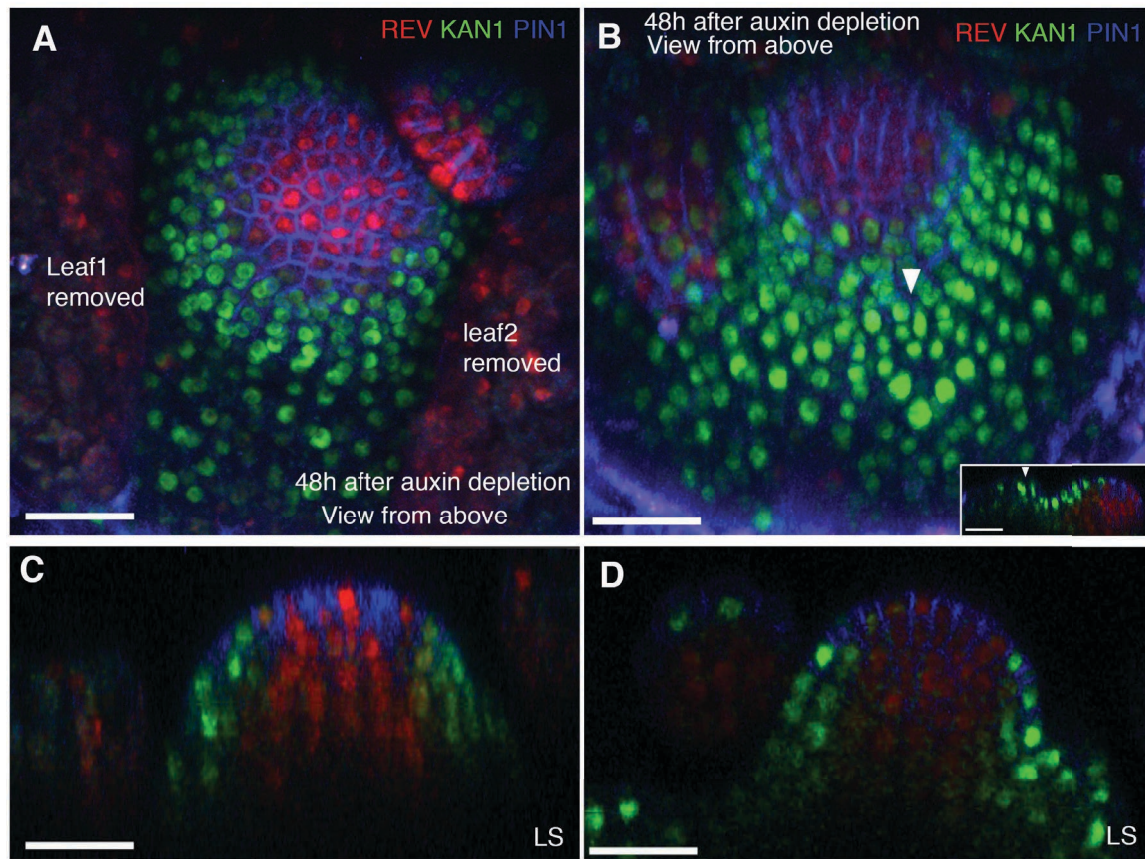

1183

1184 **Figure 12-Figure supplement 2**

1185 **Auxin depletion alters dorsoventral gene expression in the vegetative meristems.**

1186 **(A and B)** Confocal projections of the VMs showing expression pattern of REV-2×YPet  
1187 (red), KAN1-2×GFP (green) and PIN1-CFP (blue) 48 hours after the combined  
1188 application of 100µM auxinole, 100µM KYN and 100µM Yucasin (auxin depleting  
1189 drugs). Arrowhead in (B) marks an arrested leaf primordium expressing KAN  
1190 throughout. Inset in (B) shows a longitudinal optical section of the leaf primordium  
1191 ectopically expressing KAN1-2×GFP. **(C and D)** Longitudinal optical sections of the  
1192 VMs in (A) and (B) respectively. Note that the meristems grow as pins with no new  
1193 organs initiating. Scale bars 30µm (A-D, inset in B).

1194

1195

1196

1197

1198

1199

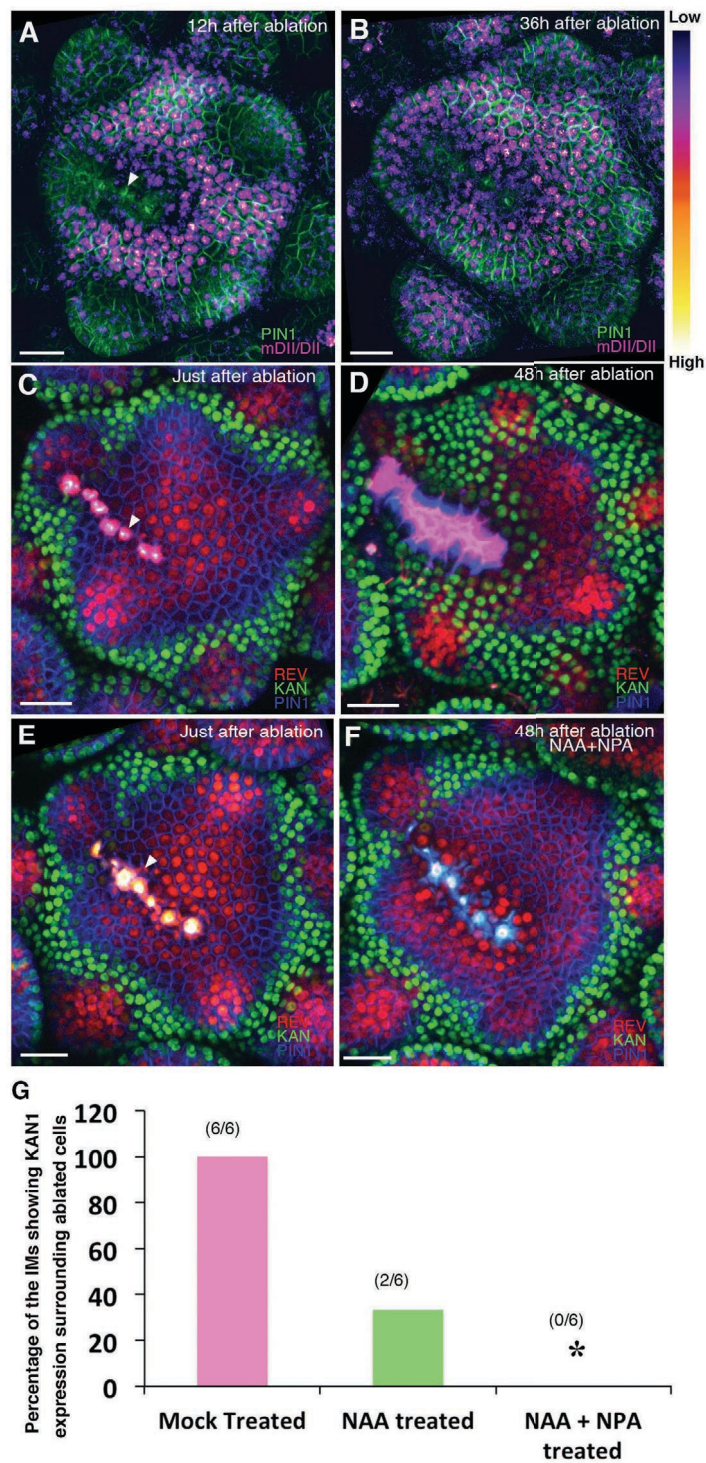

1200

1201 **Figure 13.**

1202 **Wounding induces KANADI1 expression in response to low auxin.**

1203 (A and B) Confocal projections of IMs showing predicted auxin distribution (magenta)

1204 based on R2D2 expression 12hours (A) and 36 hours (B) after wounding. Note low

1205 predicted auxin levels in the cells surrounding the ablated cells. **(C and D)** Confocal  
1206 projections of the IMs showing expression pattern of REV-2×YPet (red), KAN1-2×GFP  
1207 (green) and PIN1-CFP (blue) immediately after ablation (ablated cells indicated a white  
1208 arrowhead) (C) and 48 hours after (D). Note KAN1 expression (green) has completely  
1209 surrounded the wounded cells 48h after the ablation (D) compared to (C). **(E and F)**  
1210 Confocal projections of the IMs showing expression pattern of REV-2×YPet (red),  
1211 KAN1-2×GFP (green) and PIN1-CFP (blue) immediately after ablation (ablated cells are  
1212 marked by white arrowhead) (E) and 48 hours after ablation and combined NAA and  
1213 NPA application (F). Note absence of KAN1 expression (green) surrounding the wound  
1214 when wounding is accompanied by the exogenous addition of auxin and NPA (compare  
1215 to (D)). **(G)** Quantification of wounding induced ectopic KAN1 expression upon mock  
1216 treatment (n=6/6), NAA application (n=2/6) and NAA + NPA combination (n= 0/6)  
1217 application on the Arabidopsis IMs expressing REV-2×YPet, KAN1-2×GFP and PIN1-  
1218 CFP. Scale bars 30µm (A-F).  
1219



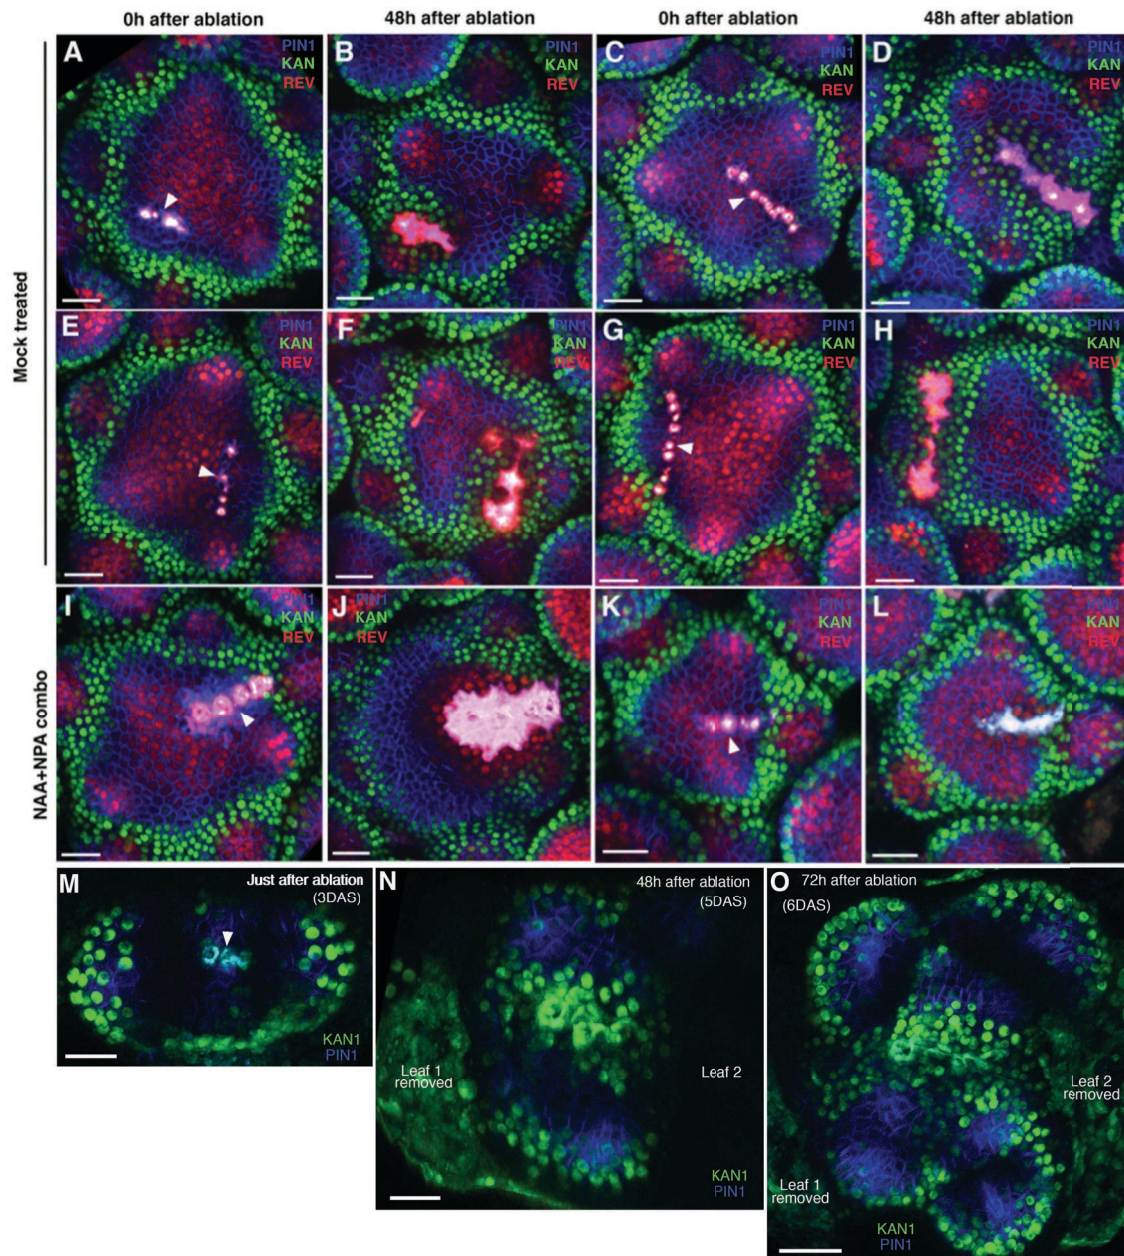

1220  
1221

1222 **Figure 13-Figure Supplement 1**

1223 **Wounding induces ectopic KAN expression in the inflorescence and vegetative**  
1224 **meristems.**

1225 (A-H) Confocal projections of the inflorescence meristems showing expression pattern  
1226 of KAN1-2×GFP (green) and PIN1-CFP (blue) immediately after ablation (A, C, E, and  
1227 G) and corresponding meristems 48 hours after ablation (B, D, F and H). Note ectopic  
1228 KAN1 expression on both the sides of the ablated cells 48 hours after wounding. (I-L)  
1229 Confocal projections of inflorescence meristems showing expression pattern of KAN1-

1230 2×GFP (green) and PIN1-CFP (blue) immediately after (I and K) and 48 hours after  
1231 ablation and treatment with NAA and NPA (J and L). Note lack of ectopic KAN1  
1232 expression compared to comparable untreated meristems (B, D, F and H). **(M-O)**  
1233 Confocal projections of the vegetative meristems showing expression pattern of KAN1-  
1234 2×YPet (green) and PIN1-GFP (blue) immediately after ablation (M), 48 hours after  
1235 ablation (N) and 72hours after ablation (O). Ablated cells are marked by arrowhead in  
1236 (M). 72 hours after wounding the vegetative meristem appears split into at least two  
1237 distinct meristems with new leaves oriented normally with respect to each meristem (O).  
1238 Scale bars 20µm (A to N); 30µm (O).  
1239

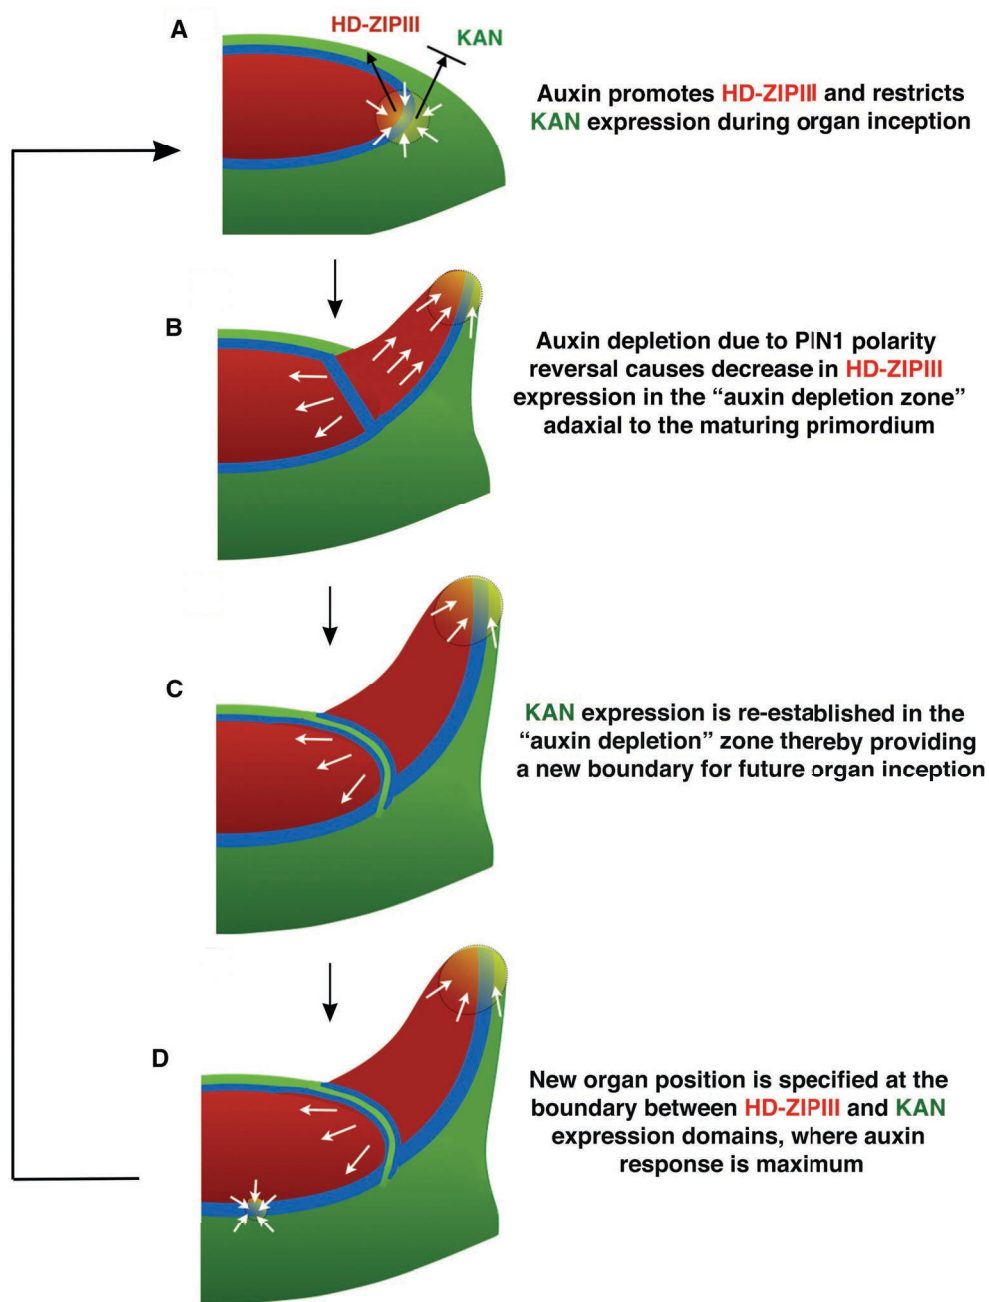

1240

1241

1242 **Figure 14: Conceptual Model.**

1243

1244 (A) During organ inception, PIN1 polarities (white arrows) and the alignment of  
1245 microtubule arrays converge to create an auxin maximum and promote growth oriented  
1246 towards the epidermal boundary between HD-ZIPIII and KANADI (KAN) expression  
1247 domains. As auxin accumulates, it promotes the expression of HD-ZIPIII thereby  
1248 resulting in its extension towards the PIN1 convergence site. At the same time, auxin also



1249 prevents the expansion of KAN adaxially. Thus the boundary becomes fixed to the  
1250 underlying cells. **(B)** As the primordium grows, PIN1 polarity in cells adaxial to the  
1251 primordium reverse towards the meristem center and adjacent incipient primordia,  
1252 thereby creating an auxin depletion zone leading to a reduction in HD-ZIPIII expression.  
1253 **(C)** The reduction in auxin results in the re-establishment of KAN expression between the  
1254 meristem and organ. **(D)** Auxin in the vicinity of the boundary in adjacent tissues leads to  
1255 a localized transcriptional response that orients the polarity of surrounding cells into a  
1256 convergence pattern, most likely via mechanical signals (Bhatia et al., 2016).  
1257

1258

1259 **Movie S1**

1260 Movie shows confocal 3D projection of a single vegetative seedling corresponding to that  
1261 shown in Fig. 6, G and H. Several leaf-like organs have formed on the boundary of  
1262 ectopic KAN1 expression driven by the CLV3 promoter (green). These organs express  
1263 REV (red) in restricted patterns corresponding to the three classes described in Fig. 6  
1264 (labeled Class 2, 3 and 4). Note developing leaf margins, marked by high PIN1  
1265 expression (blue) correlate with REV expression boundaries in the epidermis.

1266

1267 **Movie S2**

1268 Confocal projection of an Arabidopsis seedling 70 hours after treatment with NPA  
1269 showing view of the vegetative meristem from above with channels for PIN1-CFP (blue),  
1270 REV-2x YPet (red) and KAN1-2xGFP (green) alternating (also shown as a snapshot in  
1271 Figure 11C). Note the absence of contiguous KAN1 expression in between the meristem  
1272 and older leaves potentially due to auxin build up in the absence of its regular transport.

1273

1274

1275

1276 **Computational model files (separate file as one zipped archive)**

1277 Archive containing files used for the computational model. Files will be extracted to the  
1278 directory modelFiles, and further information is found in the file README.txt in this  
1279 directory.

1280

1281

1282
